# Supplementary material
Source: publisher figshare collection journal article supplement (https://acs.figshare.com/ndownloader/files/22047756)
Supplement: Supplementary file 1 [file 22047756]

# Supporting Information

## **One-Pot Selective Saturation and Functionalization of Heteroaromatics Leading to Dihydropyridines and Dihydroquinolines**

Dong Wang,\* Yuanyang Jiang, Linru Dong, Gaoyu Li, Baoying Sun, Laurent Désaubry, and Peng Yu

[wangdong@tust.edu.cn](mailto:wangdong@tust.edu.cn)

## Table of Contents

|                                                                    |       |
|--------------------------------------------------------------------|-------|
| 1. Copy of NMR spectrum for 3a-3v, 4-7 and 9-13.....               | SI-3  |
| 2. Rationalization of the relative stereo configuration of 13..... | SI-37 |
| 3. Copy of NMR spectrum for 14-19.....                             | SI-38 |
| 4. Rationalization of the relative stereo configuration of 19..... | SI-45 |

# SUPPORTING INFORMATION

## 1. Copy of NMR spectrum for 3a-3v, 4-7 and 9-13

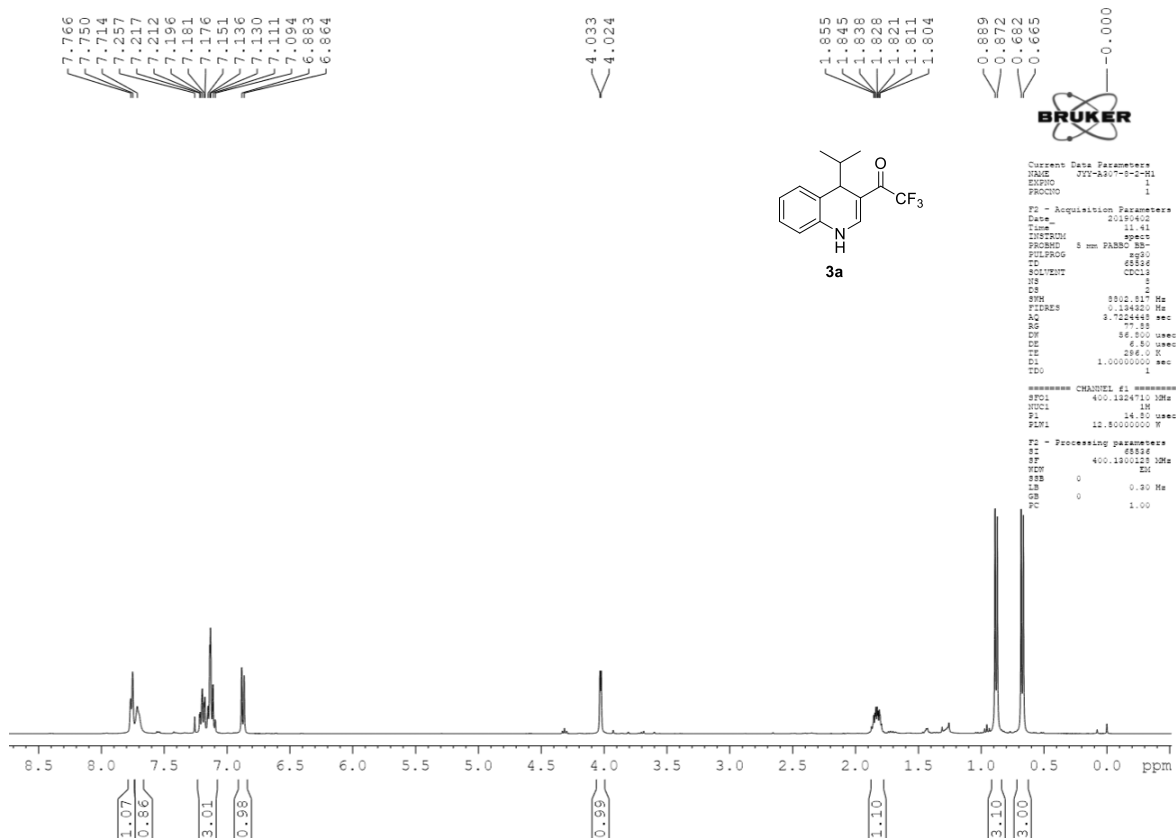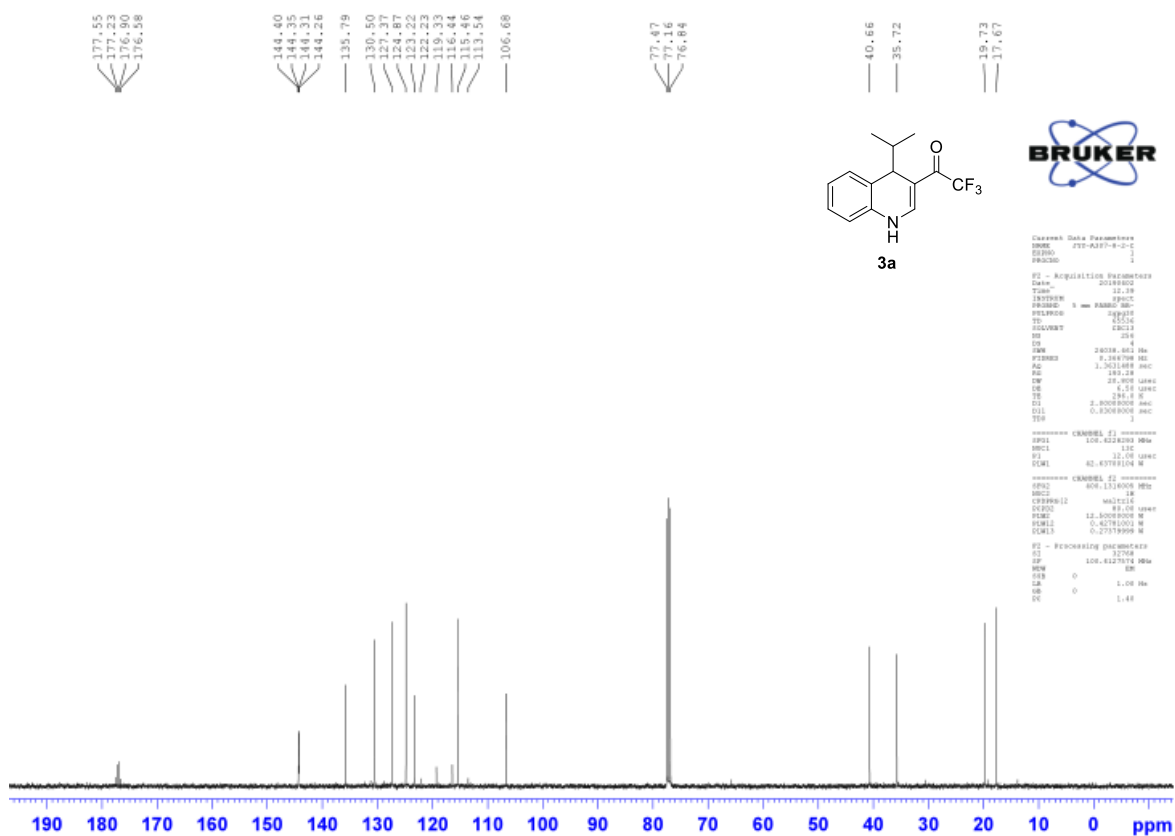

SUPPORTING INFORMATION

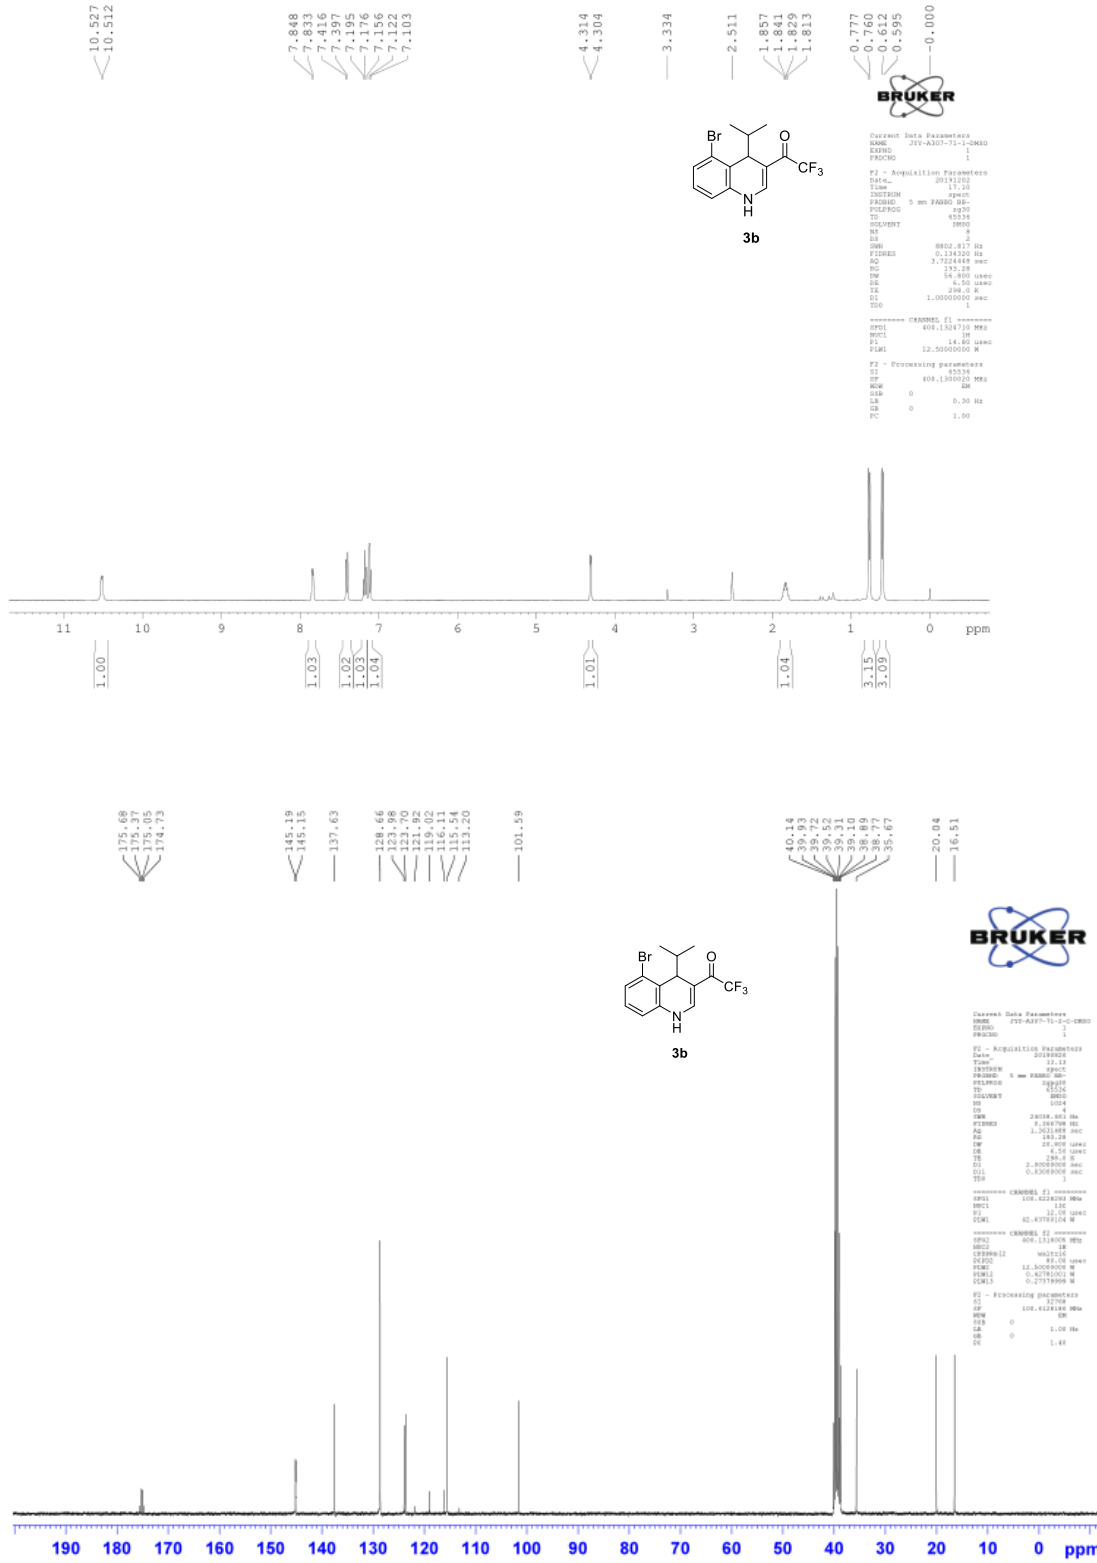

# SUPPORTING INFORMATION

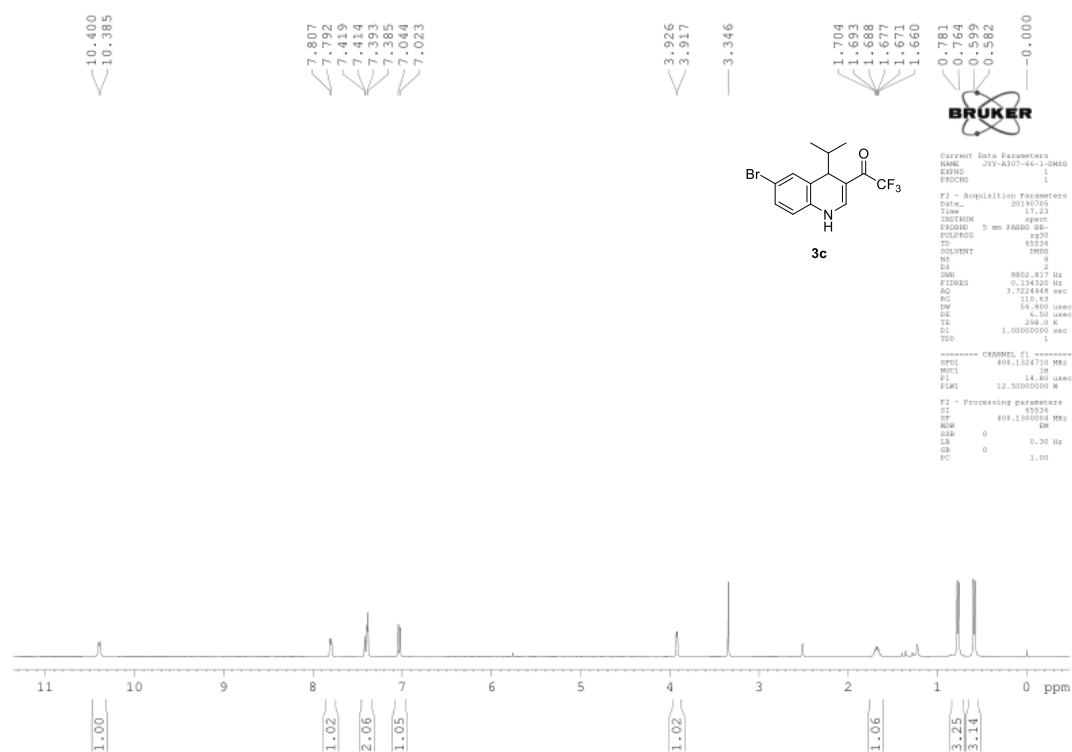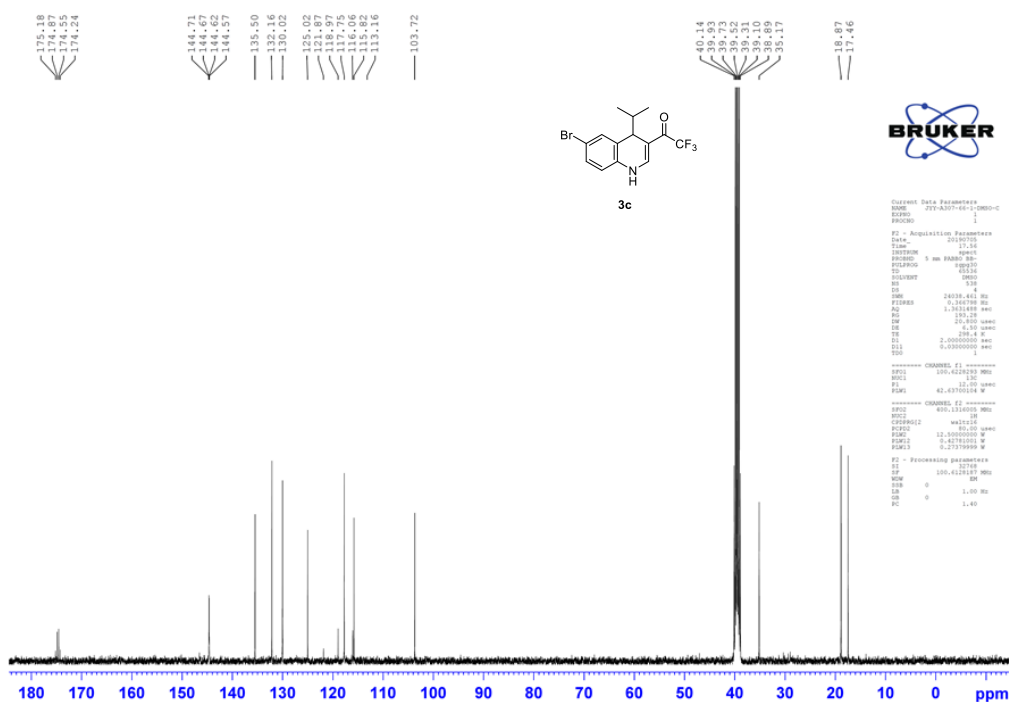

# SUPPORTING INFORMATION

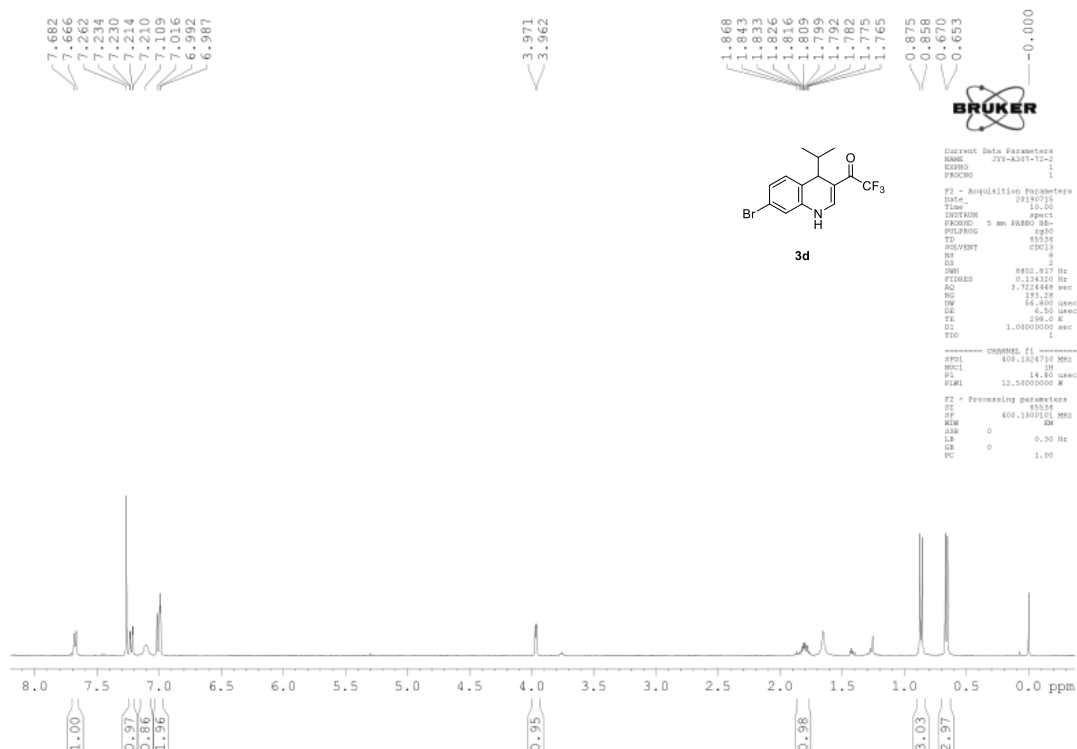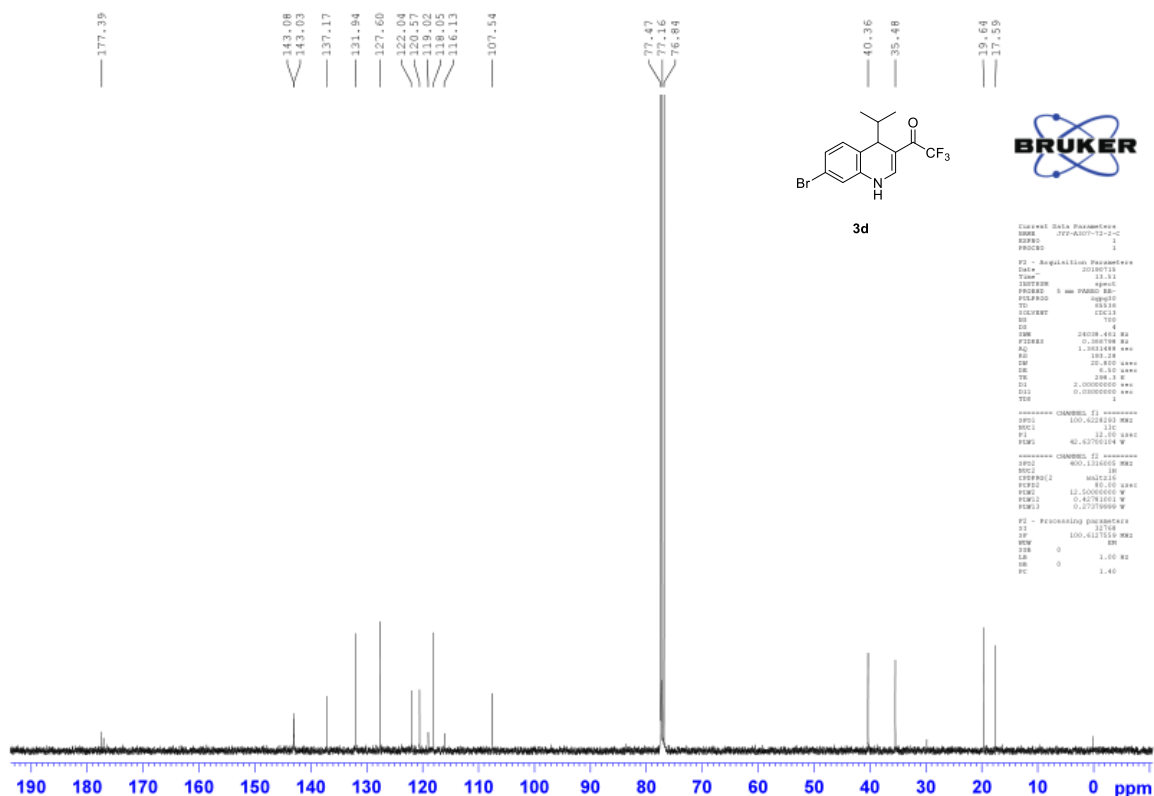

# SUPPORTING INFORMATION

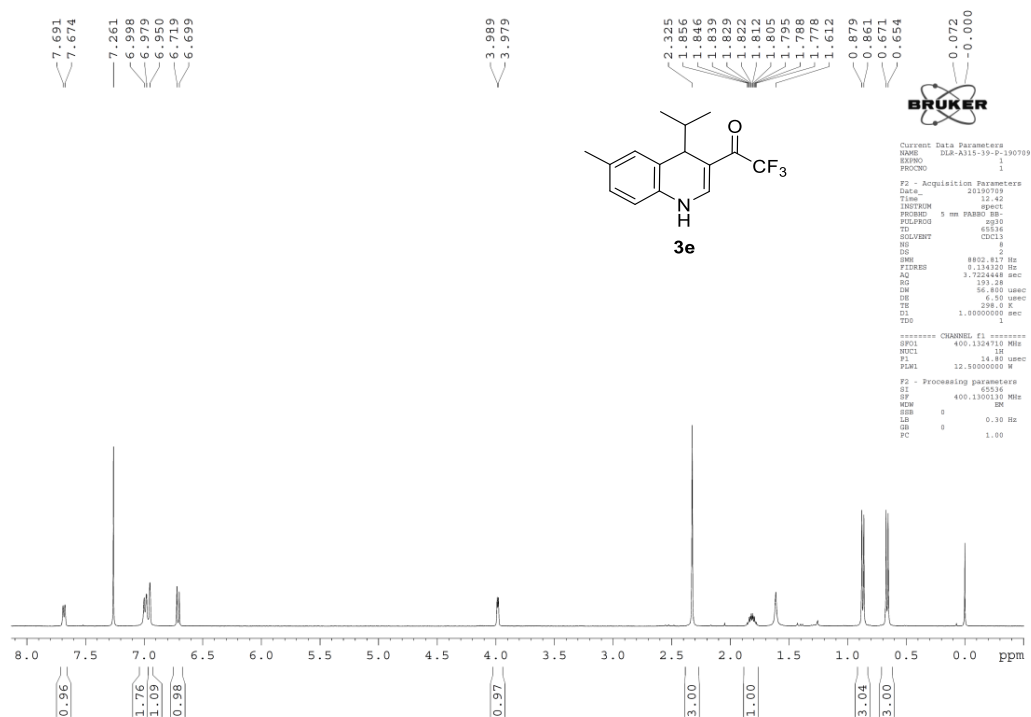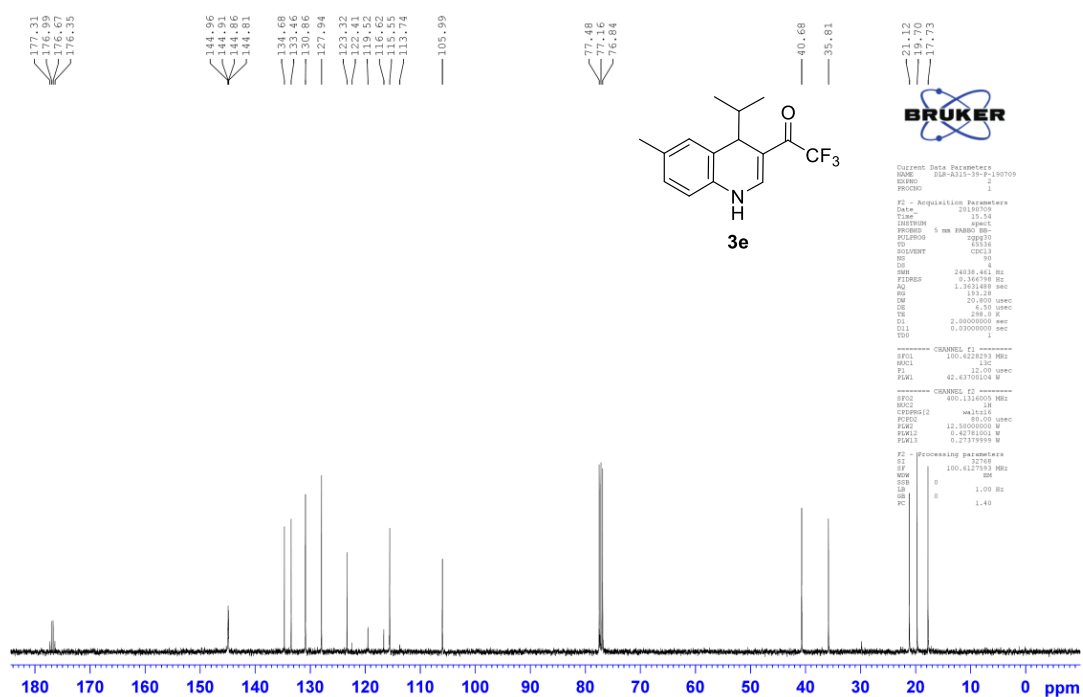

SUPPORTING INFORMATION

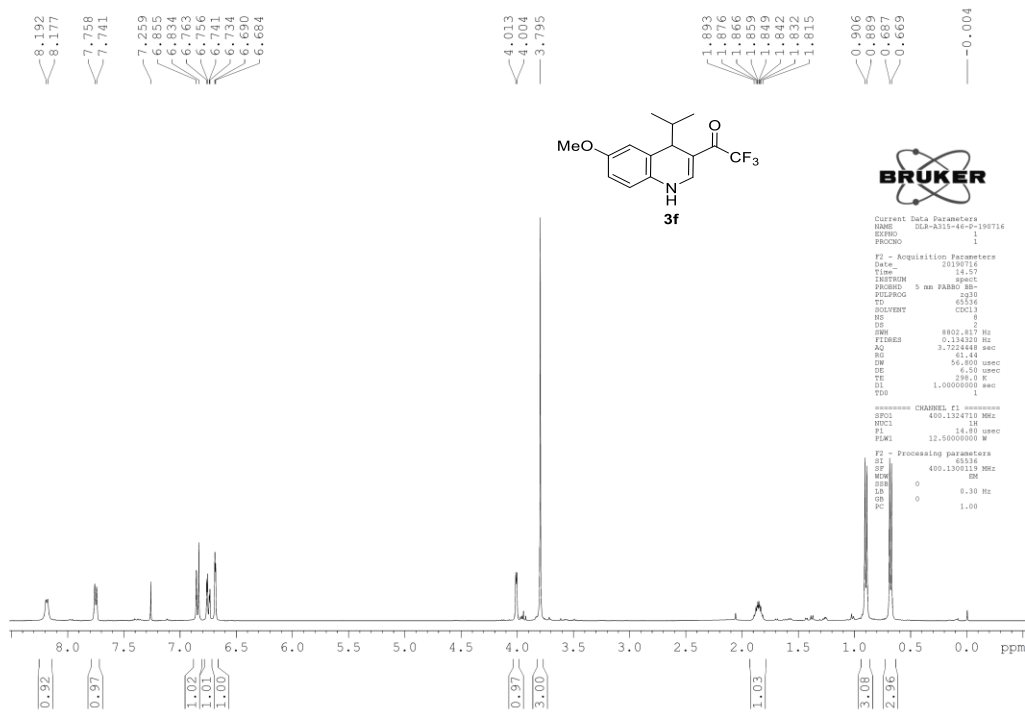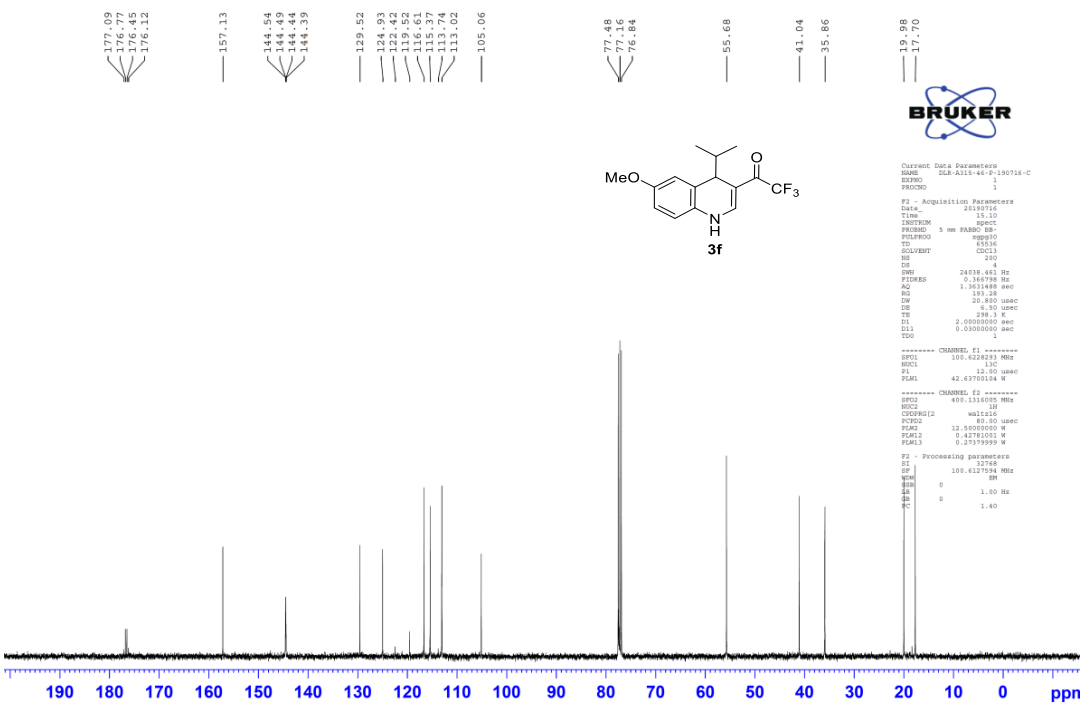



SUPPORTING INFORMATION

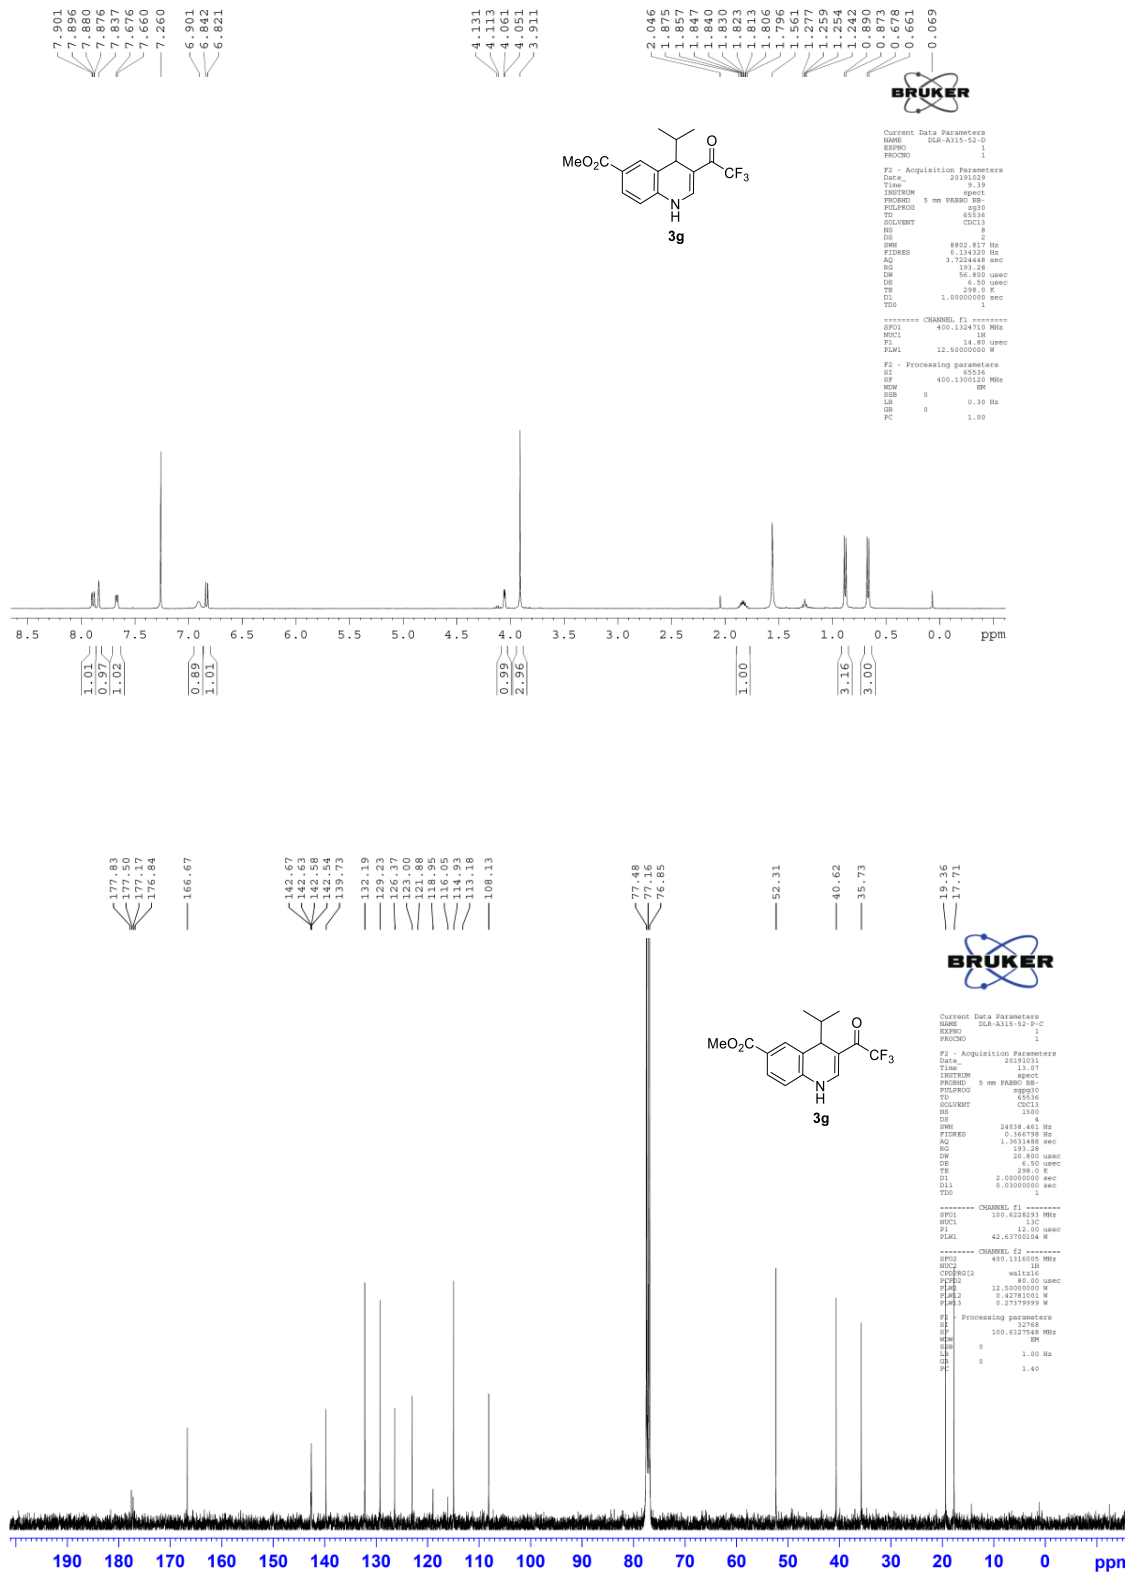

# SUPPORTING INFORMATION

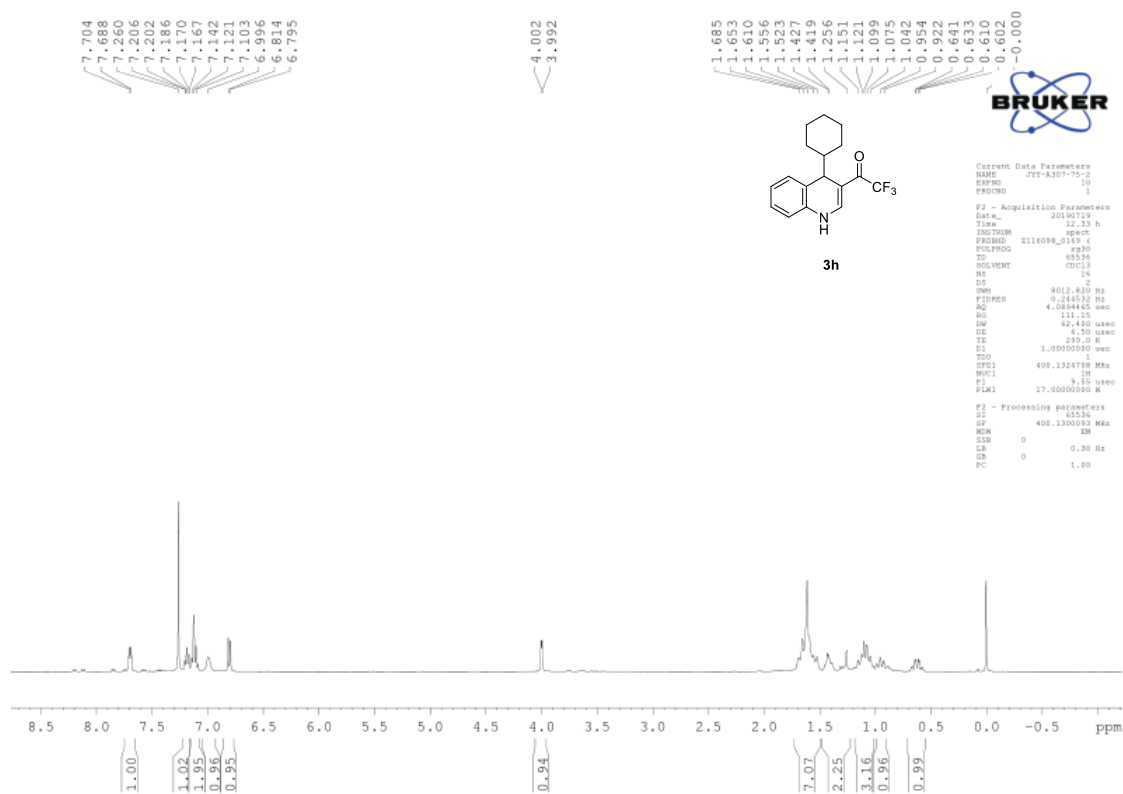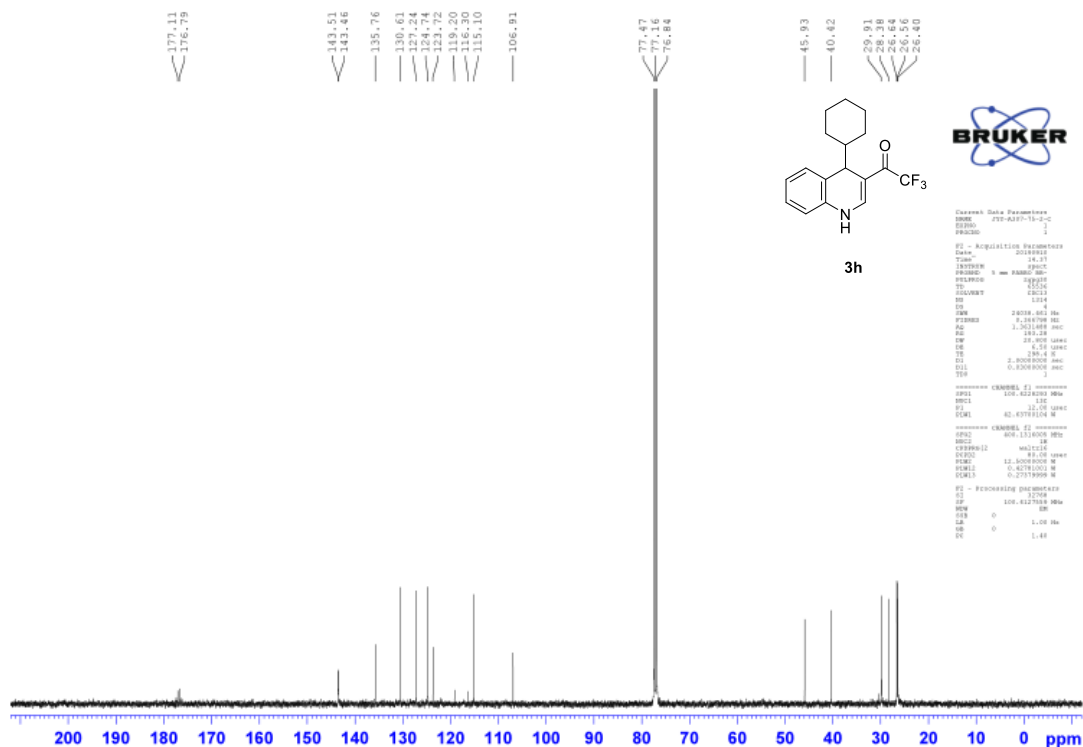

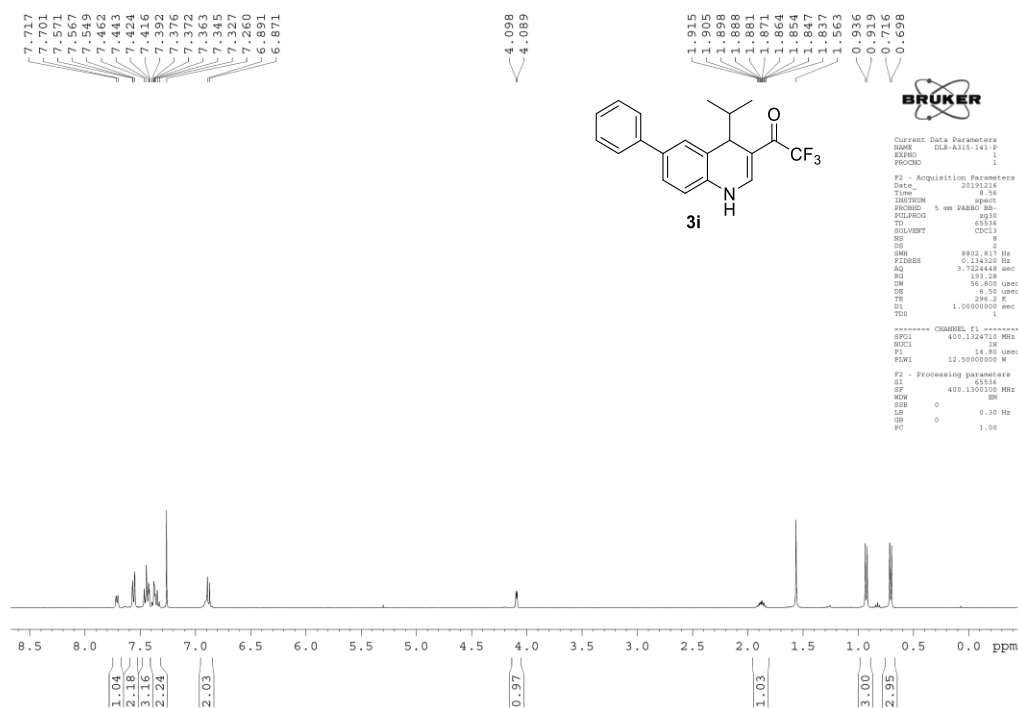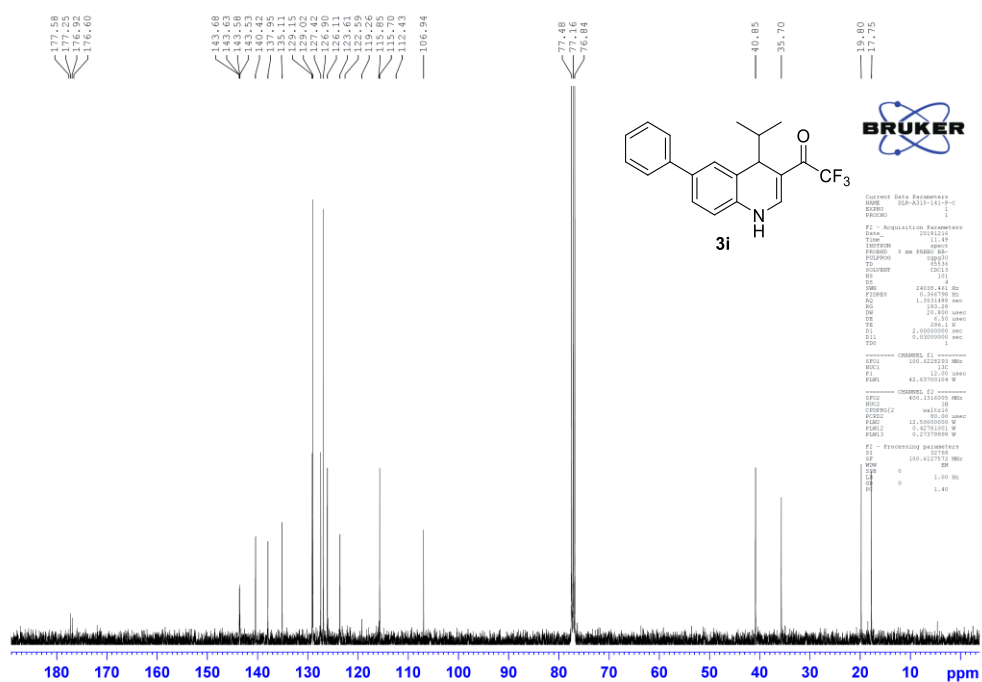

SUPPORTING INFORMATION

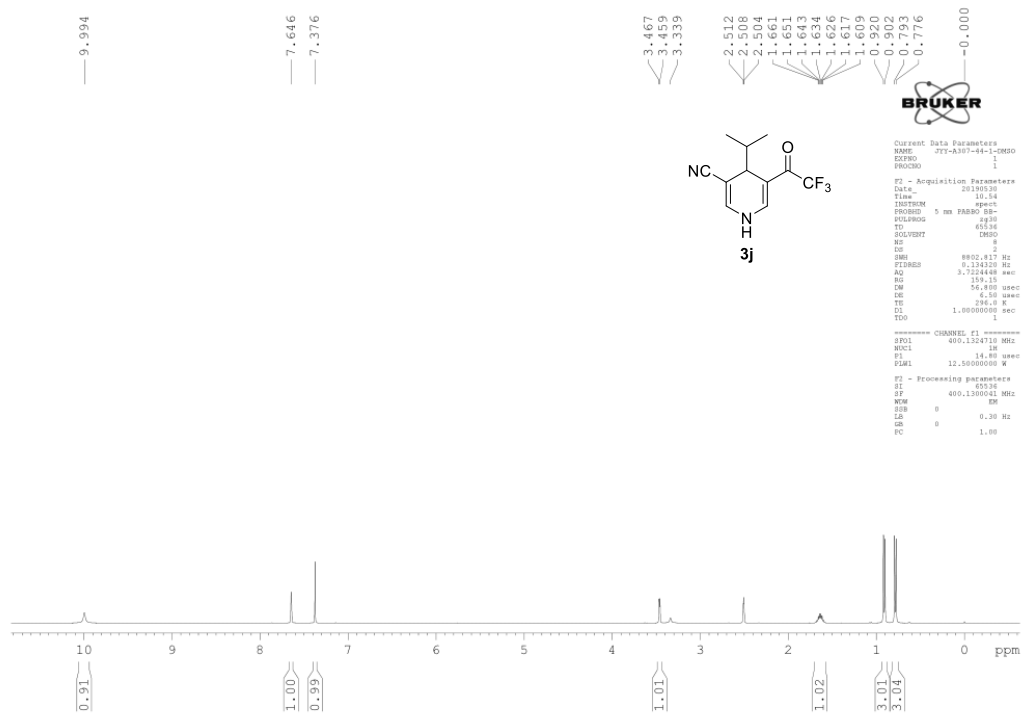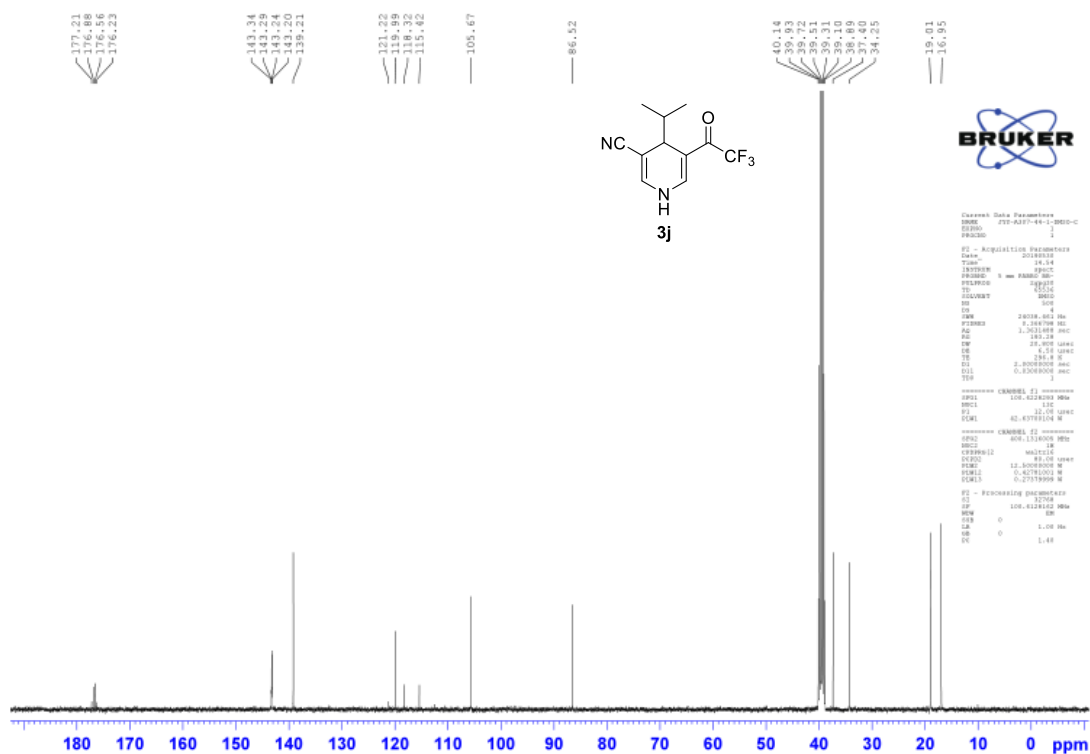

SUPPORTING INFORMATION

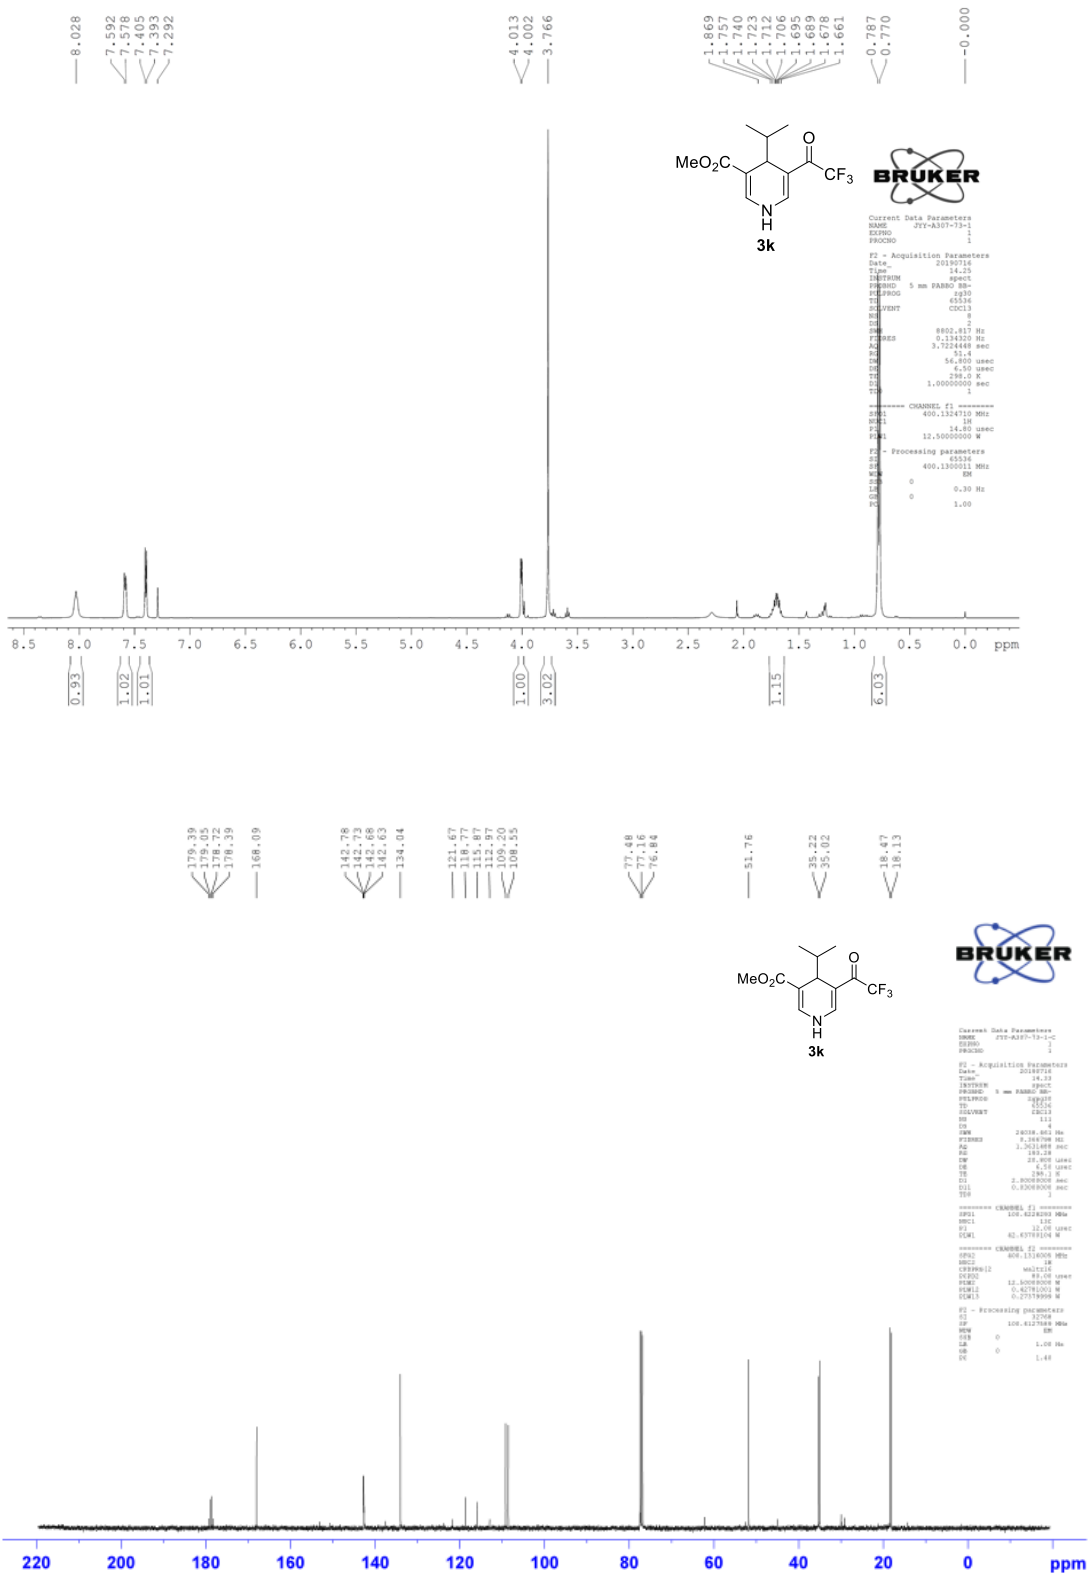

# SUPPORTING INFORMATION

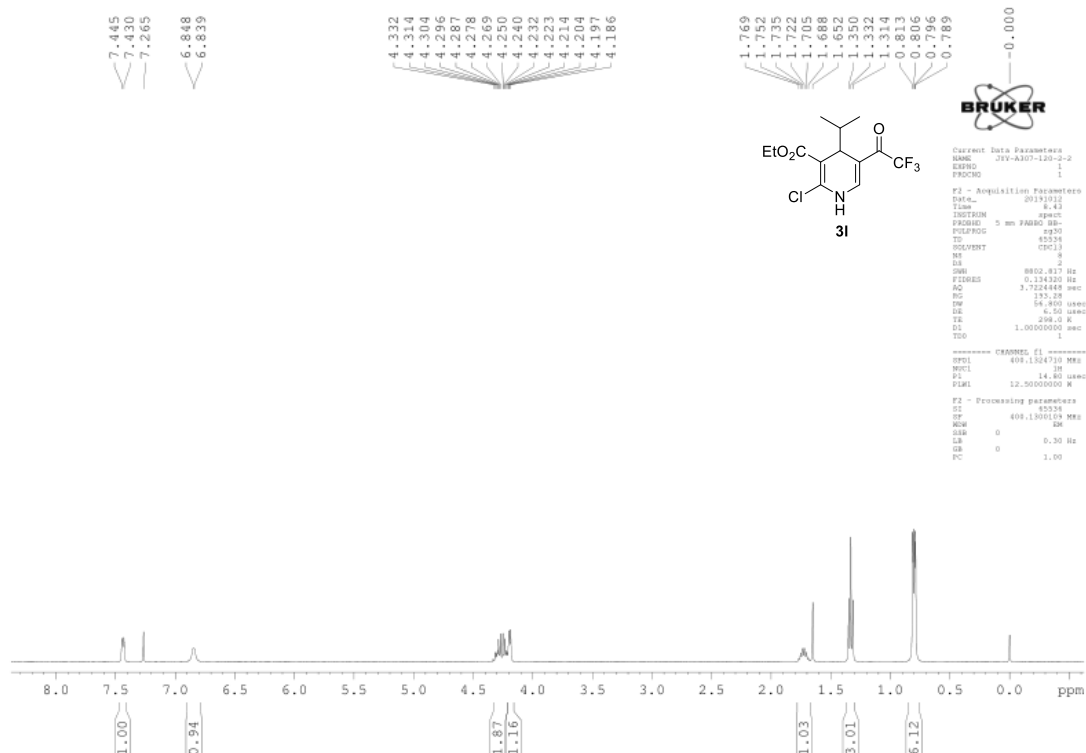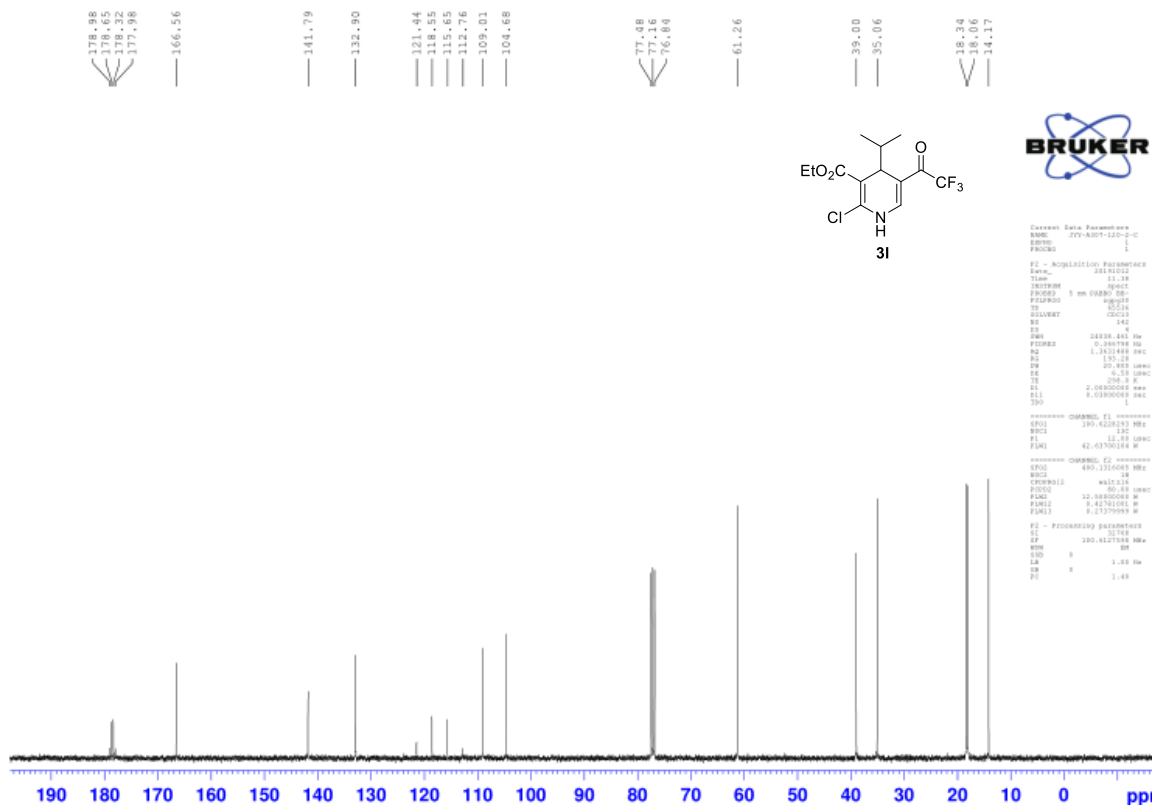

# SUPPORTING INFORMATION

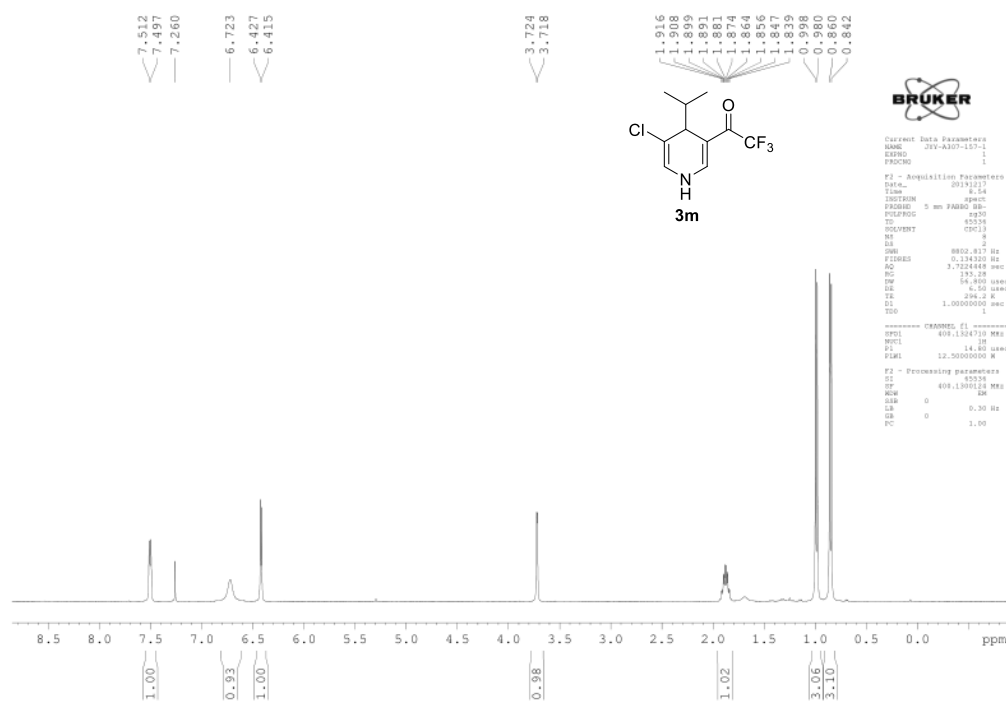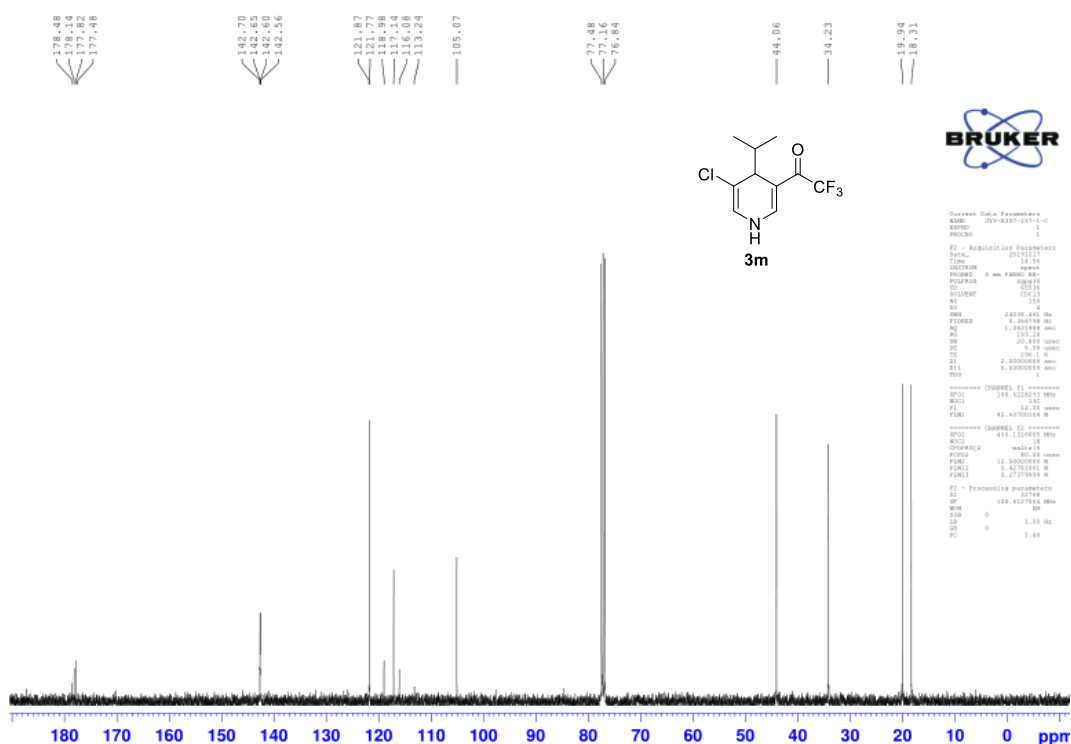

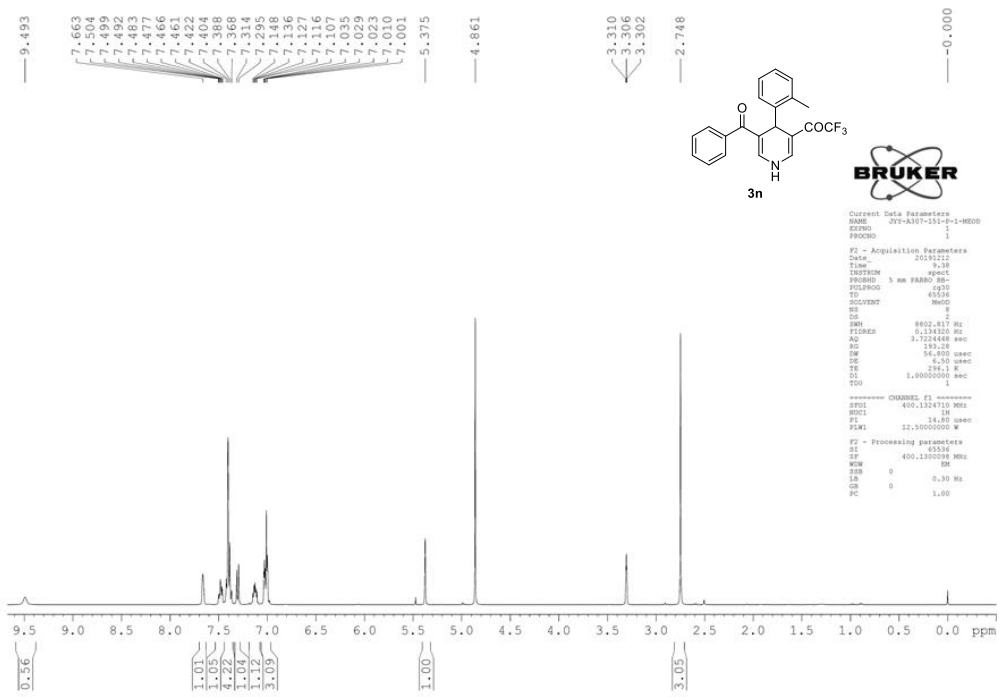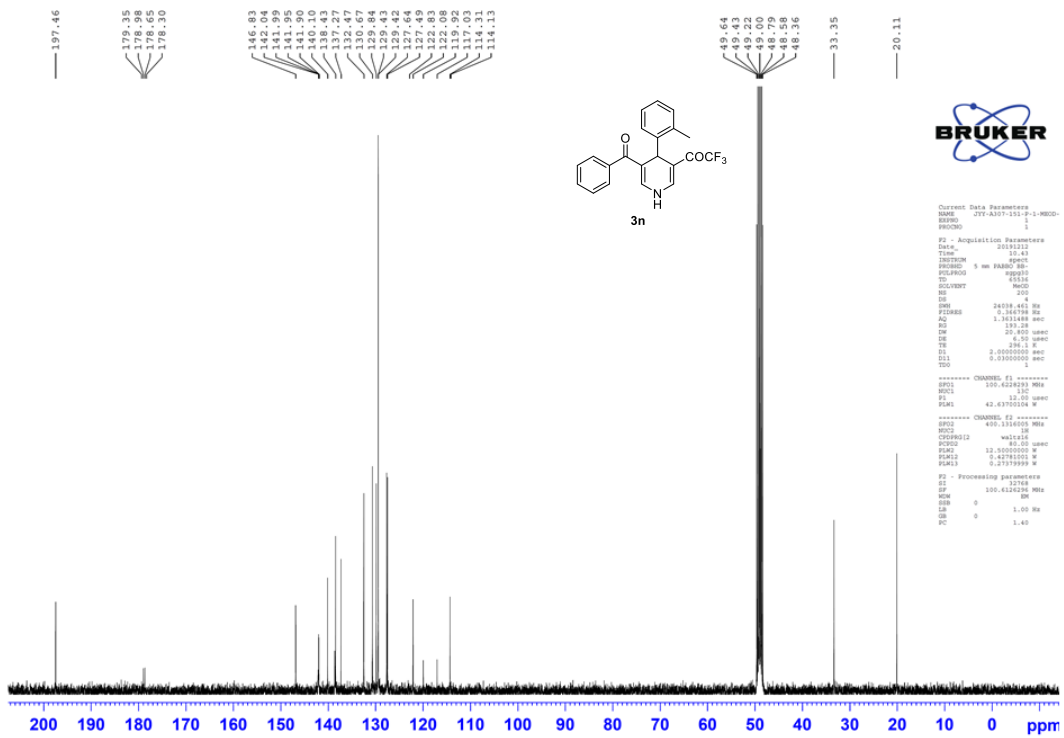



# SUPPORTING INFORMATION

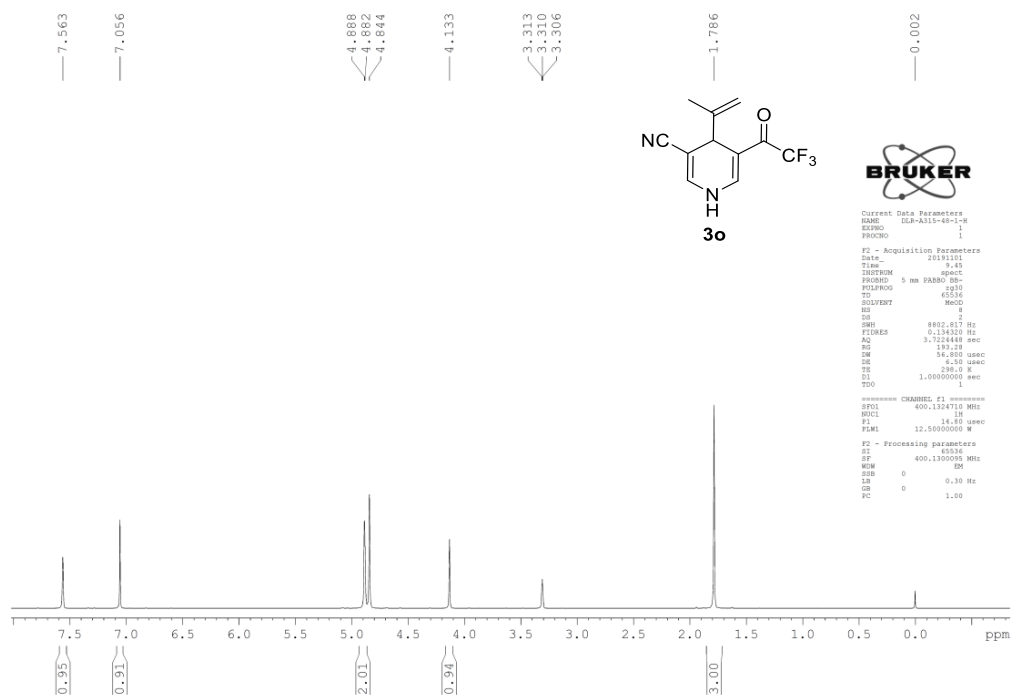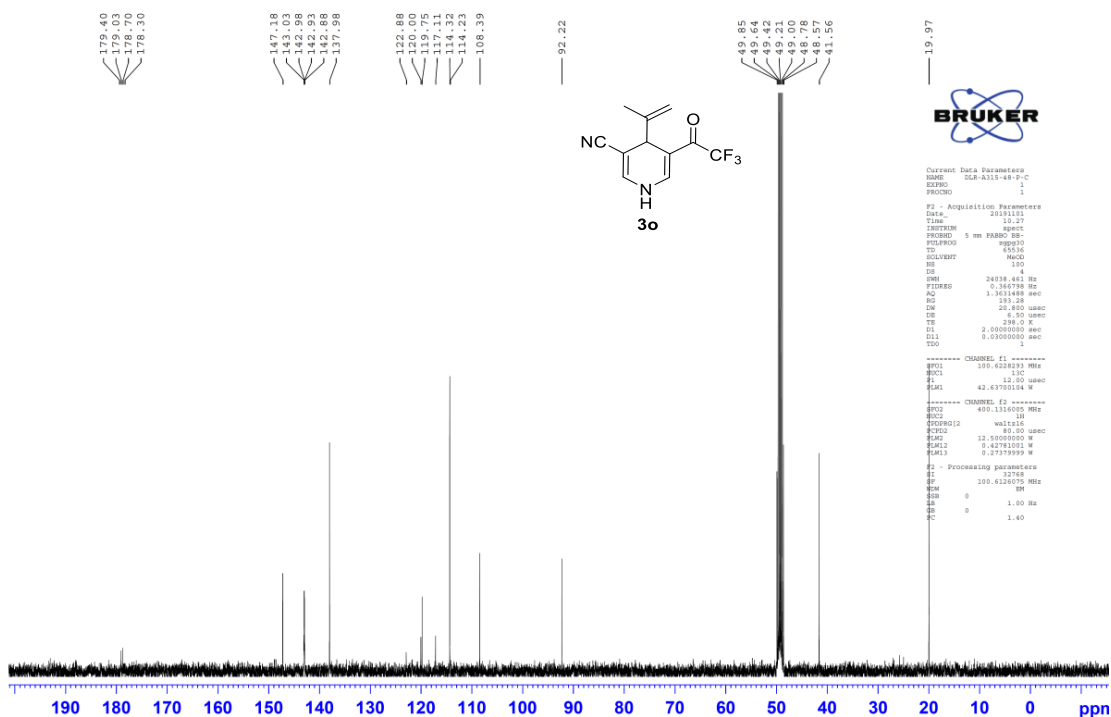

SUPPORTING INFORMATION

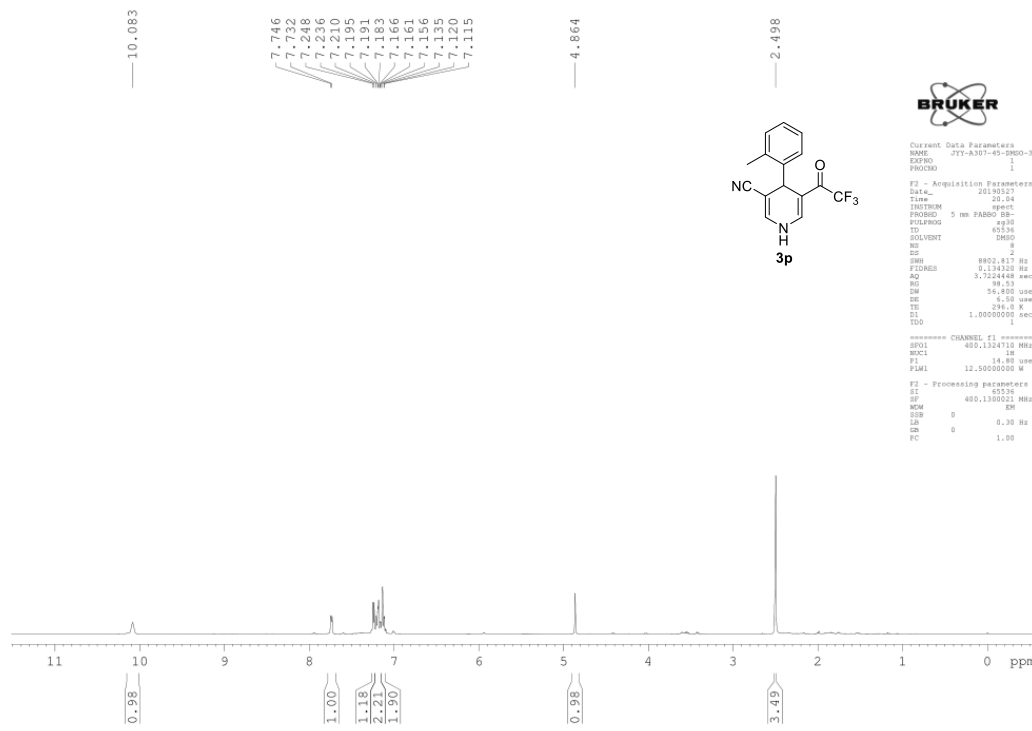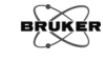

Current Data Parameters  
NAME JTY-A307-43-DMO-3  
EXPNO 1  
PROCNO 1  
F2 - Acquisition Parameters  
Date\_ 20180527  
Time 00.04  
INSTRUM spect  
PROBHD 5 mm PABBO BB-  
PULPROG zgpg30  
TD 65536  
SOLVENT DMSO  
NS 2  
DS 8802.817 Hz  
FIDRES 0.114333 Hz  
AQ 3.725468 sec  
RG 66.03  
SW 56.850 MHz  
DE 6.50 MHz  
TE 294.2 K  
D1 1.00000000 sec  
TD0  
===== CHANNEL f1 =====  
NUC1 400.1304710 MHz  
P1 14.00  
PL1 12.50000000 W  
===== CHANNEL f2 =====  
SI - Processing parameters  
SI 50355  
SF 400.1300021 MHz  
WDW EM  
SSB 0  
LB 0.30 Hz  
GB 0  
PC 1.00

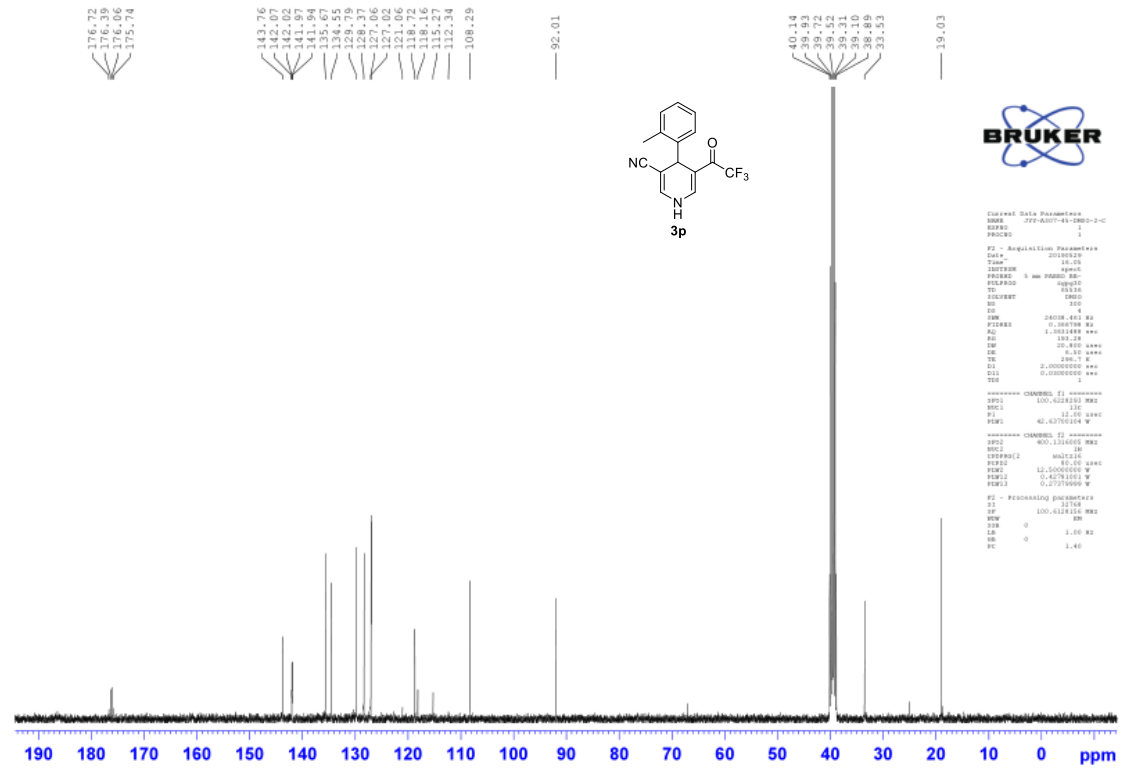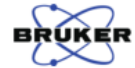

Current Data Parameters  
NAME JTY-A307-43-DMO-3-C  
EXPNO 1  
PROCNO 1  
F2 - Acquisition Parameters  
Date\_ 20180528  
Time 18.18  
INSTRUM spect  
PROBHD 5 mm PABBO BB-  
PULPROG zgpg30  
TD 65536  
SOLVENT DMSO  
NS 4  
DS 28038.861 Hz  
FIDRES 0.100709 Hz  
AQ 1.2001698 sec  
RG 66.03  
SW 180.28 MHz  
DE 6.50 MHz  
TE 294.2 K  
D1 2.00000000 sec  
D11 0.00000000 sec  
TD 1  
===== CHANNEL f1 =====  
NUC1 100.6261850 MHz  
P1 12.00  
PL1 42.43700000 W  
===== CHANNEL f2 =====  
SI - Processing parameters  
SI 50355  
SF 100.6181116 MHz  
WDW EM  
SSB 0  
LB 0.30 Hz  
GB 0  
PC 1.40

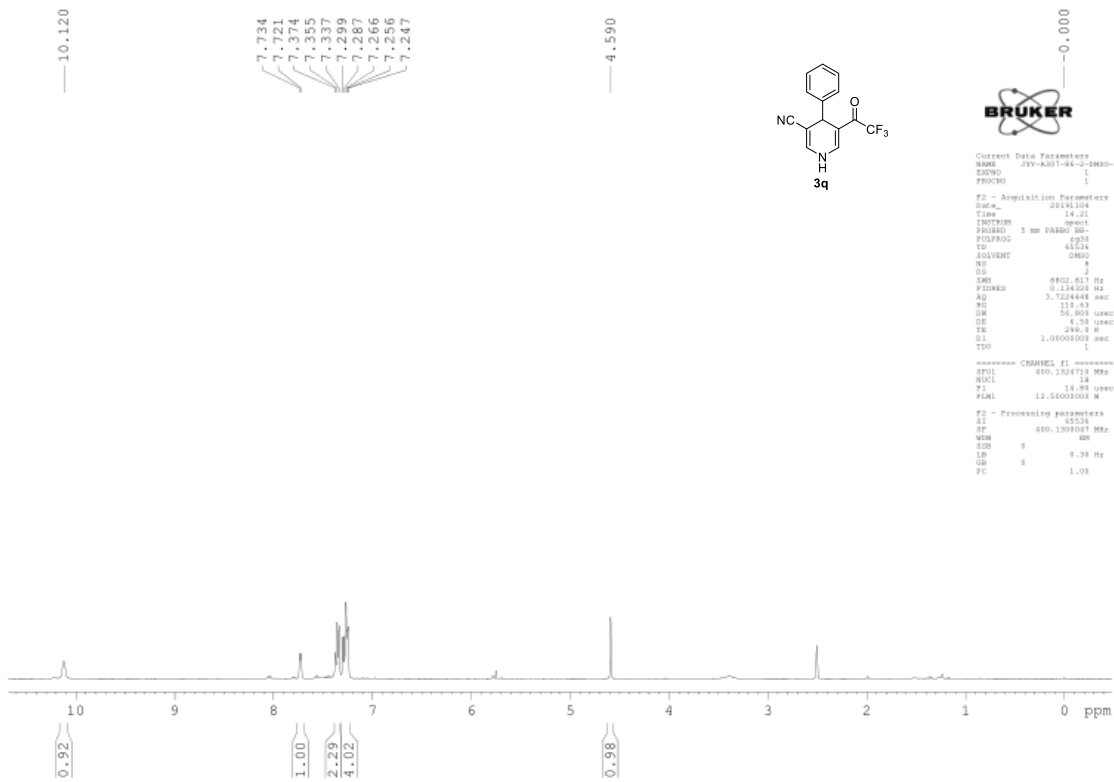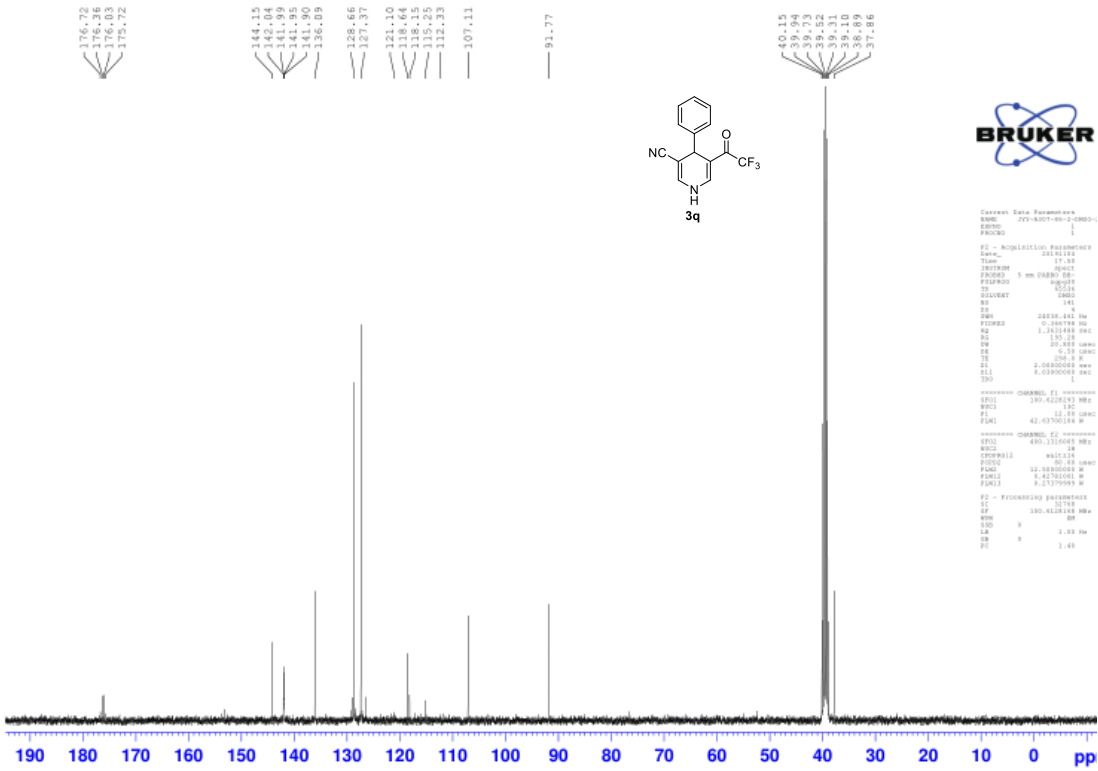

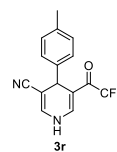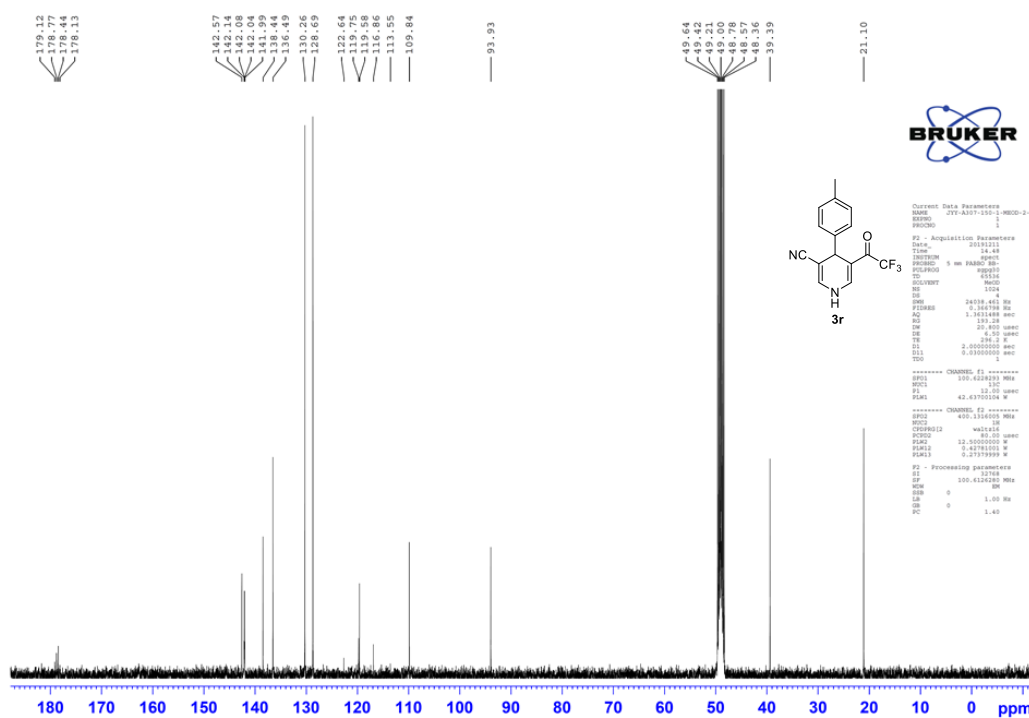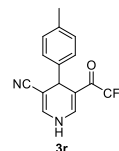

SUPPORTING INFORMATION

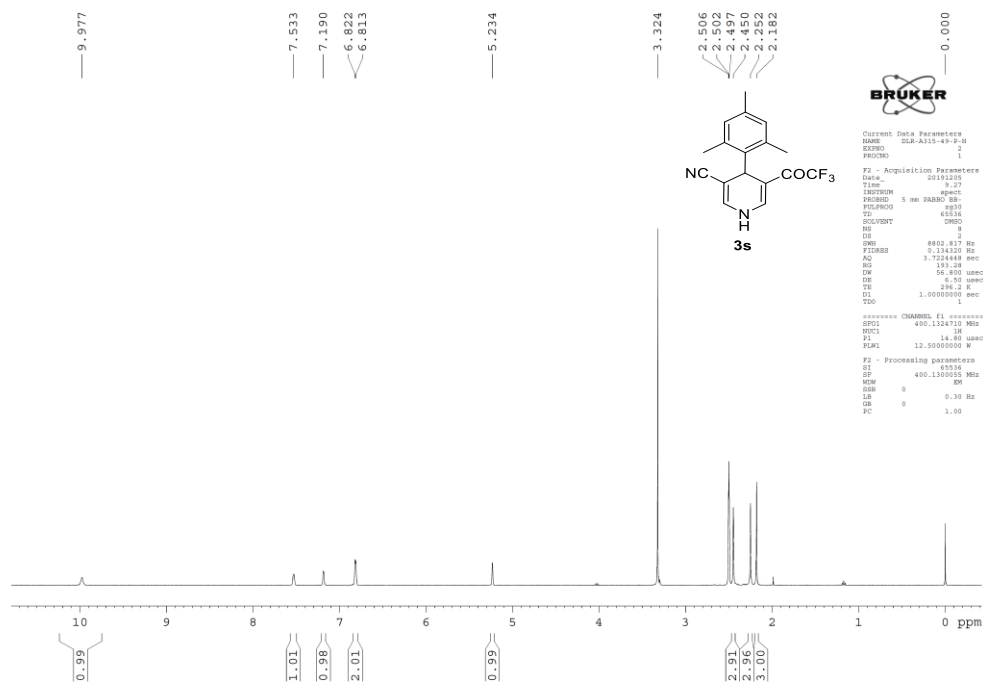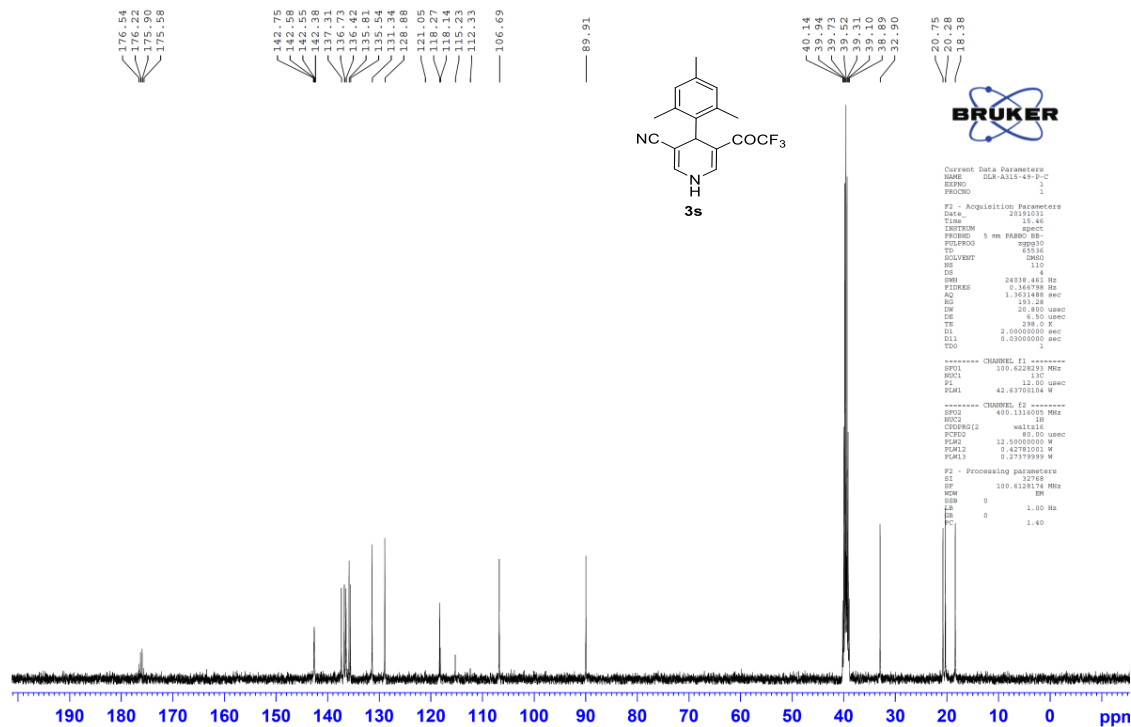

SUPPORTING INFORMATION

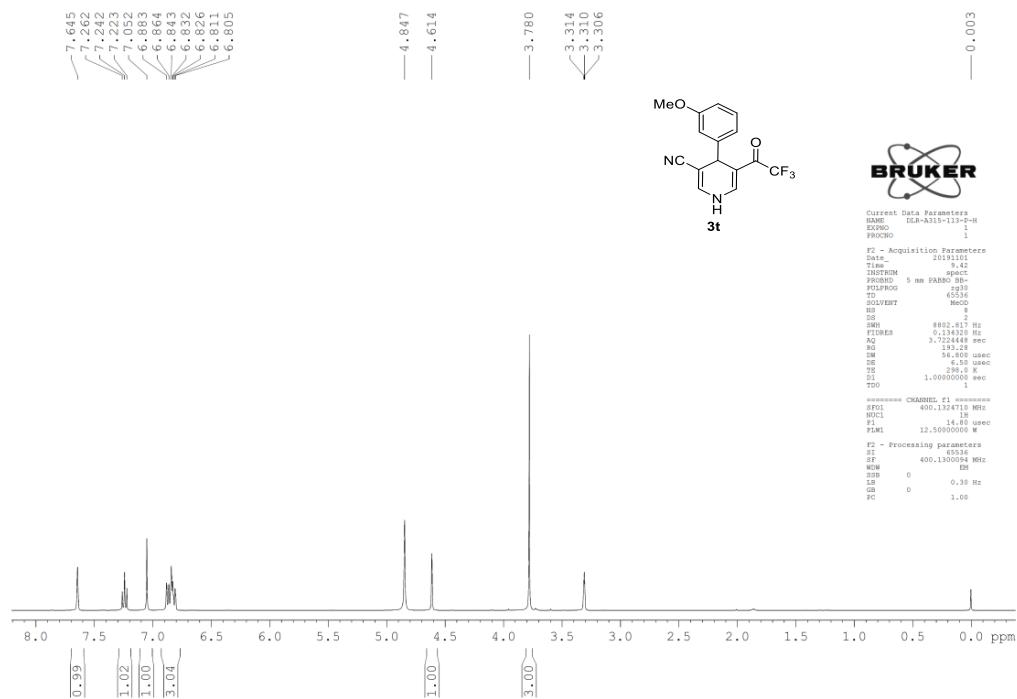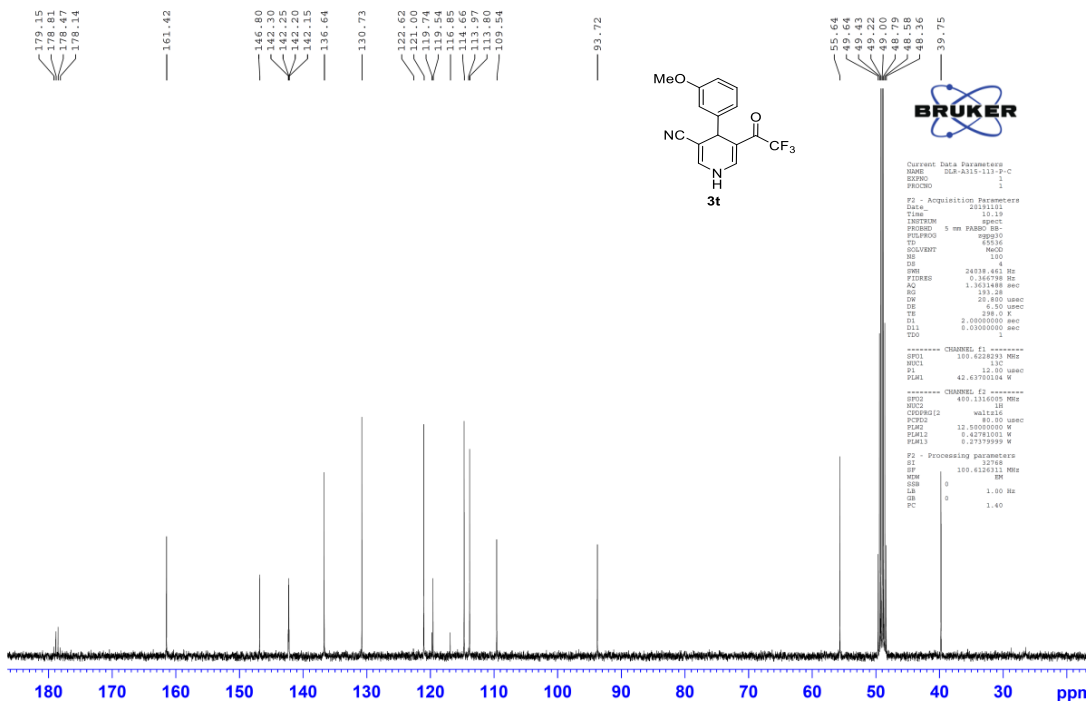

# SUPPORTING INFORMATION

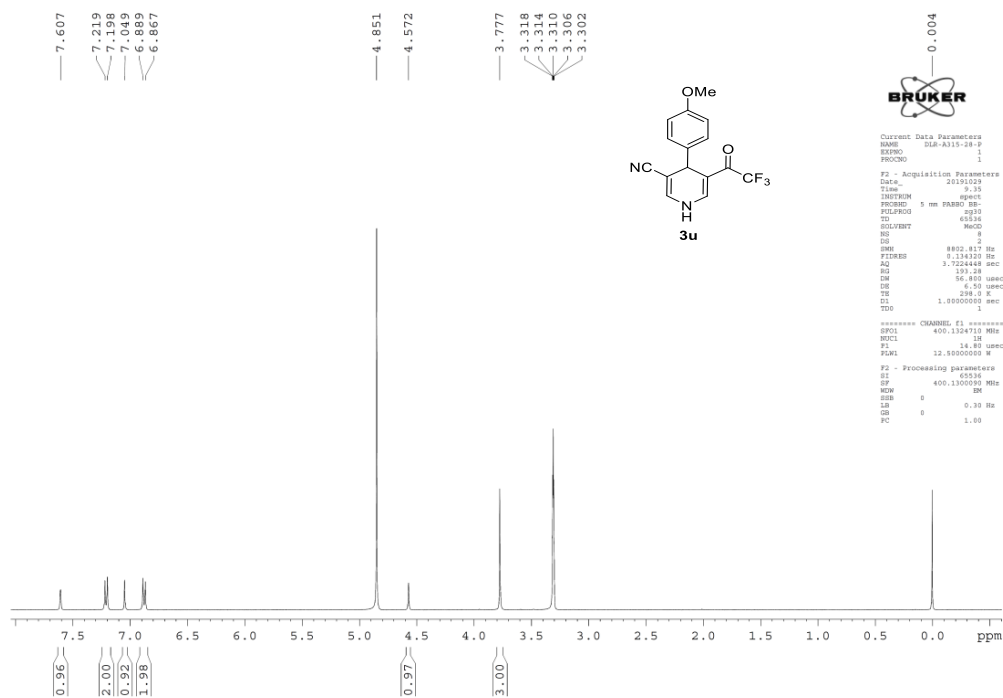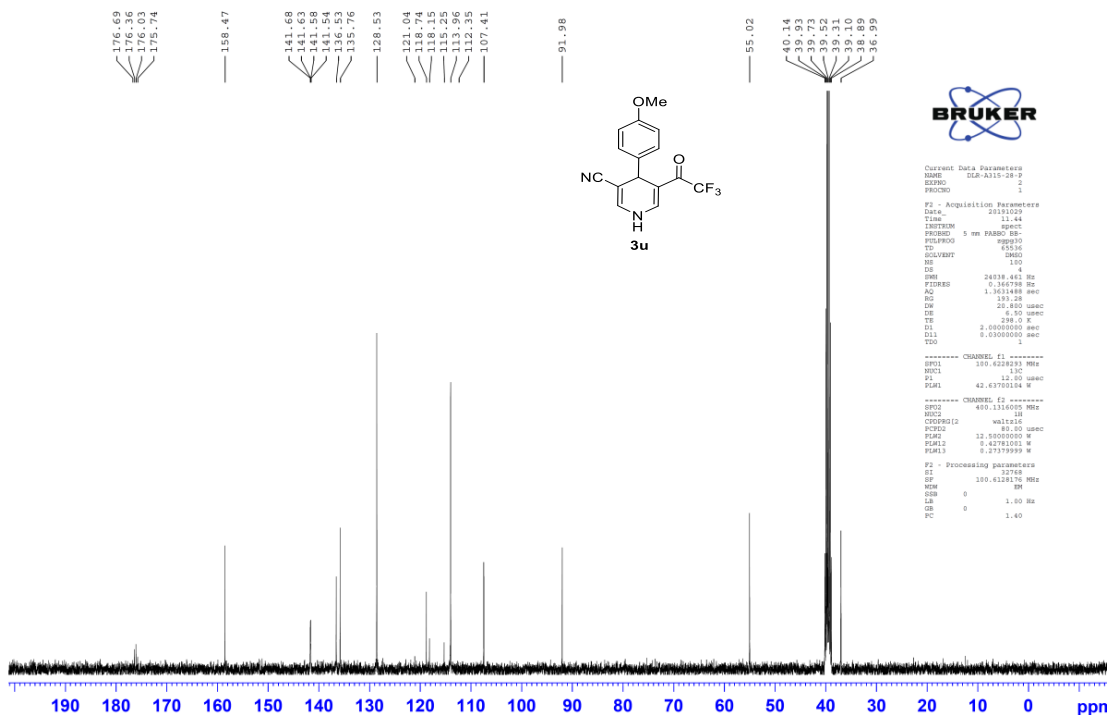

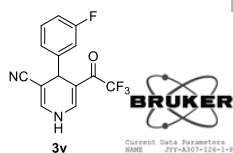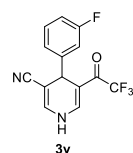



# SUPPORTING INFORMATION

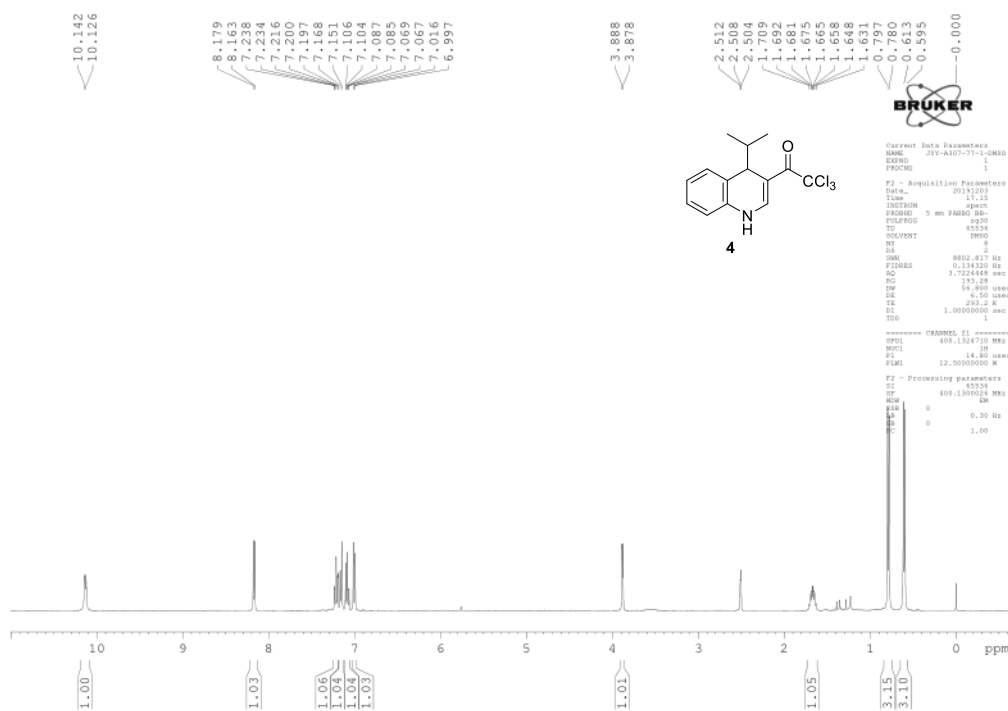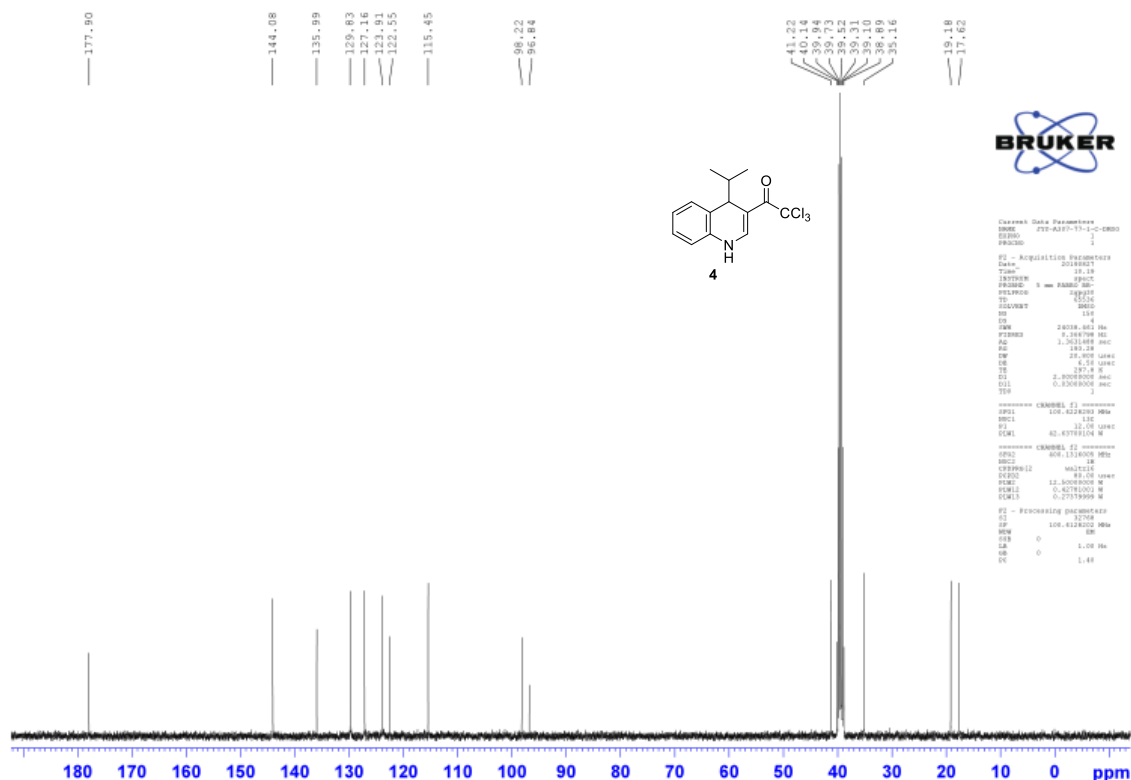

# SUPPORTING INFORMATION

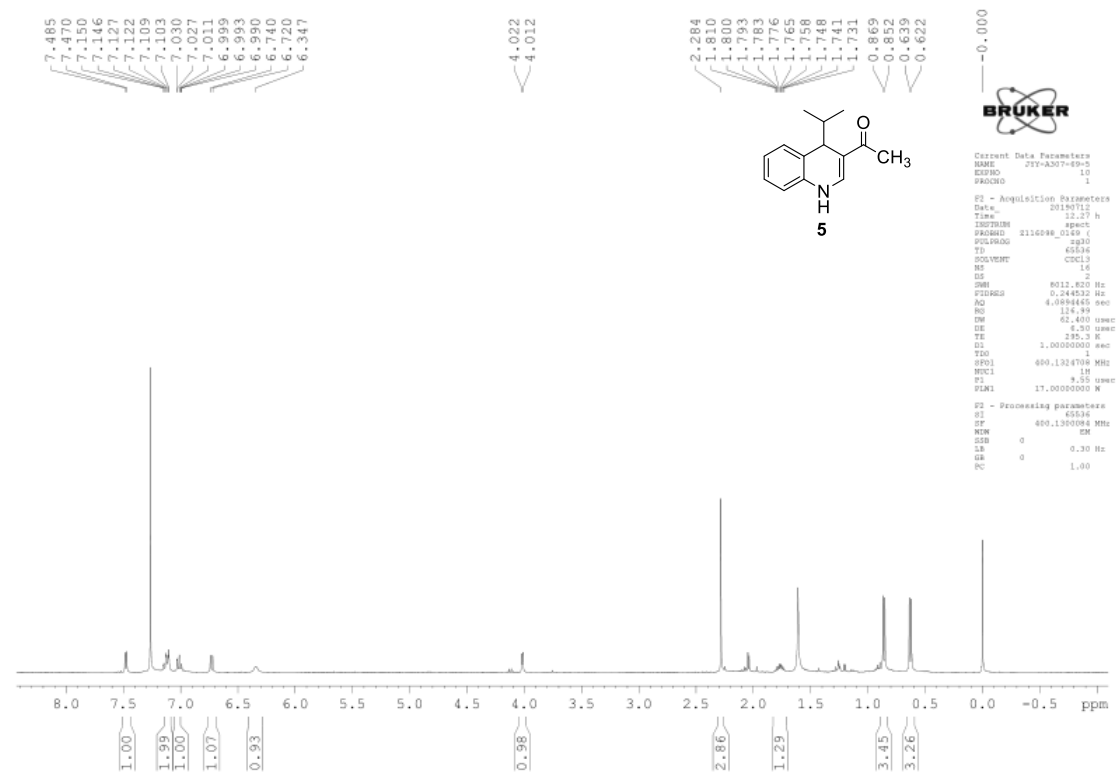

**Current Data Parameters**  
 NAME: 2T-A307-49-4  
 EXPNO: 1  
 PROCNO: 1  
 F2 - Acquisition Parameters  
 Date\_: 20190712  
 Time: 12.27 h  
 INSTRUM: spect  
 PROBM40: E114098\_0149 (4  
 PULPROG: zgpg30  
 TD: 65536  
 SOLVENT: CDCl3  
 NS: 16  
 DS: 4  
 SWH: 8012.820 Hz  
 FIDRES: 0.244532 Hz  
 AQ: 4.0898463 sec  
 RG: 114.89  
 FM: 62.450 usec  
 DE: 6.50 usec  
 TE: 300.2 K  
 D1: 1.00000000 sec  
 DELTA: 1  
 RFDR1: 600.1324709 MHz  
 WDC1: 18  
 P1: 9.50 usec  
 PLW1: 17.00000000 W  
 F2 - Processing parameters  
 SI: 65536  
 SF: 600.1300984 MHz  
 NUC: 13  
 SSB: 0  
 LB: 0.30 Hz  
 GB: 0  
 RB: 1.00

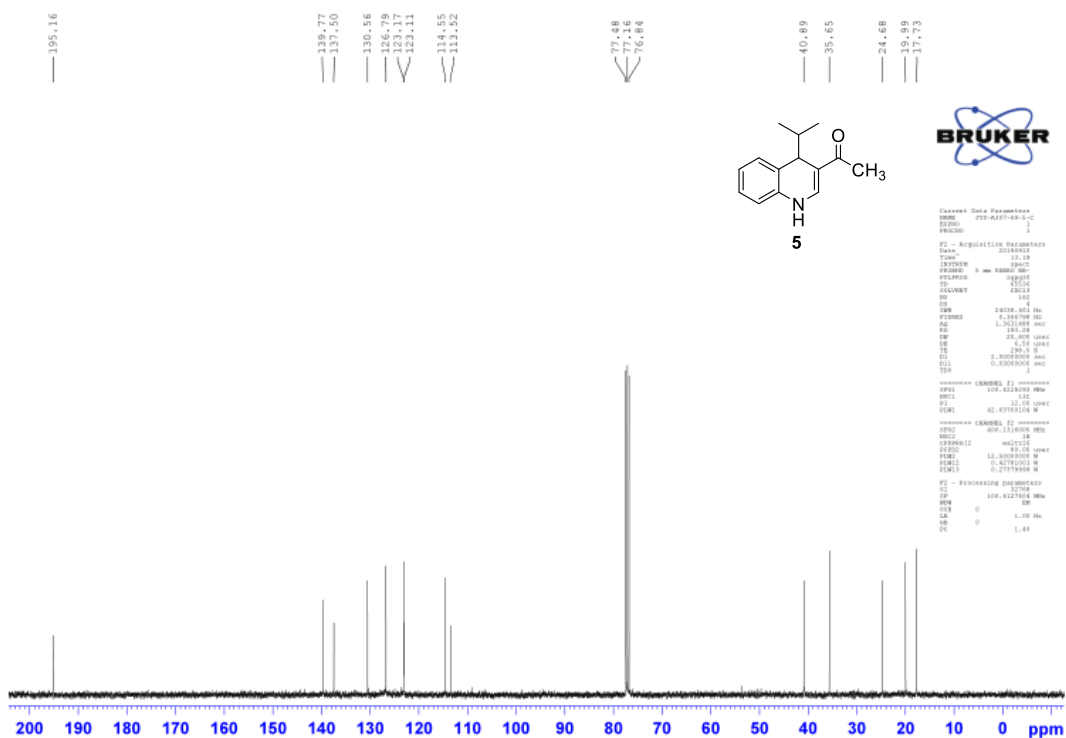

**Current Data Parameters**  
 NAME: 2T-A307-49-4-2  
 EXPNO: 1  
 PROCNO: 1  
 F2 - Acquisition Parameters  
 Date\_: 20190712  
 Time: 12.19 h  
 INSTRUM: spect  
 PROBM40: E114098\_0149 (4  
 PULPROG: zgpg30  
 TD: 65536  
 SOLVENT: CDCl3  
 NS: 16  
 DS: 4  
 SWH: 24038.402 Hz  
 FIDRES: 0.180708 Hz  
 AQ: 1.2613485 sec  
 RG: 183.18  
 FM: 27.907 usec  
 DE: 6.10 usec  
 TE: 300.2 K  
 D1: 2.00000000 sec  
 DELTA: 0.20000000 sec  
 RFDR1: 100.6224200 MHz  
 WDC1: 12  
 P1: 12.00 usec  
 PLW1: 62.63767104 W  
 F2 - Processing parameters  
 SI: 65536  
 SF: 100.6224200 MHz  
 NUC: 13  
 SSB: 0  
 LB: 0.30 Hz  
 GB: 0  
 RB: 1.00

SUPPORTING INFORMATION

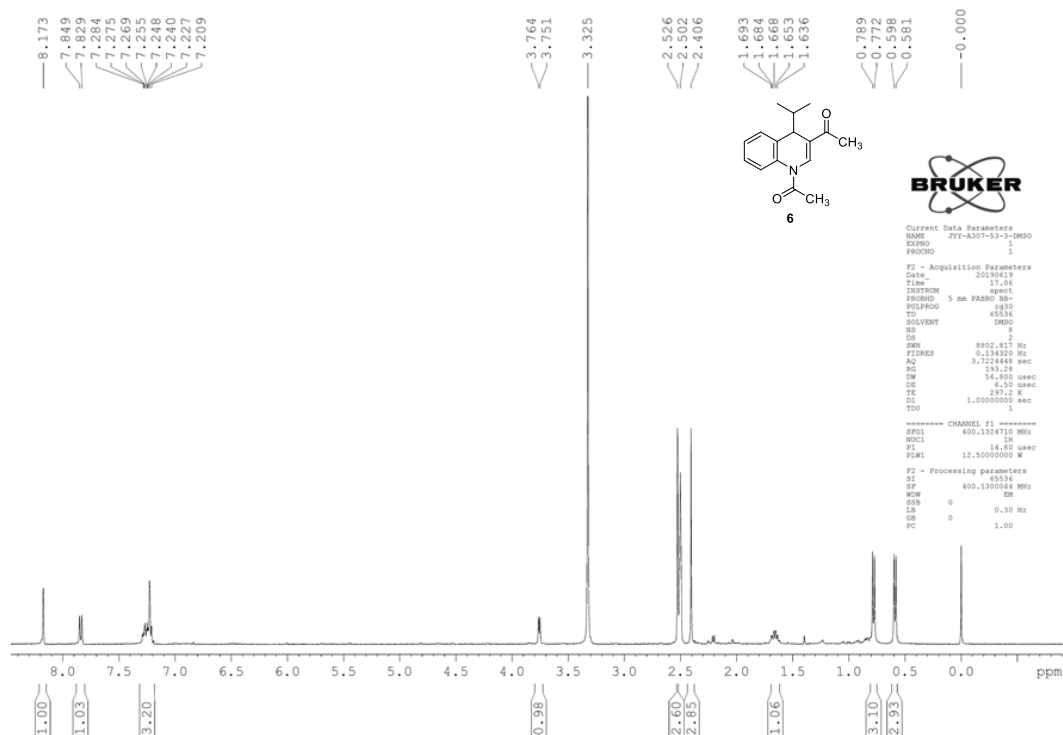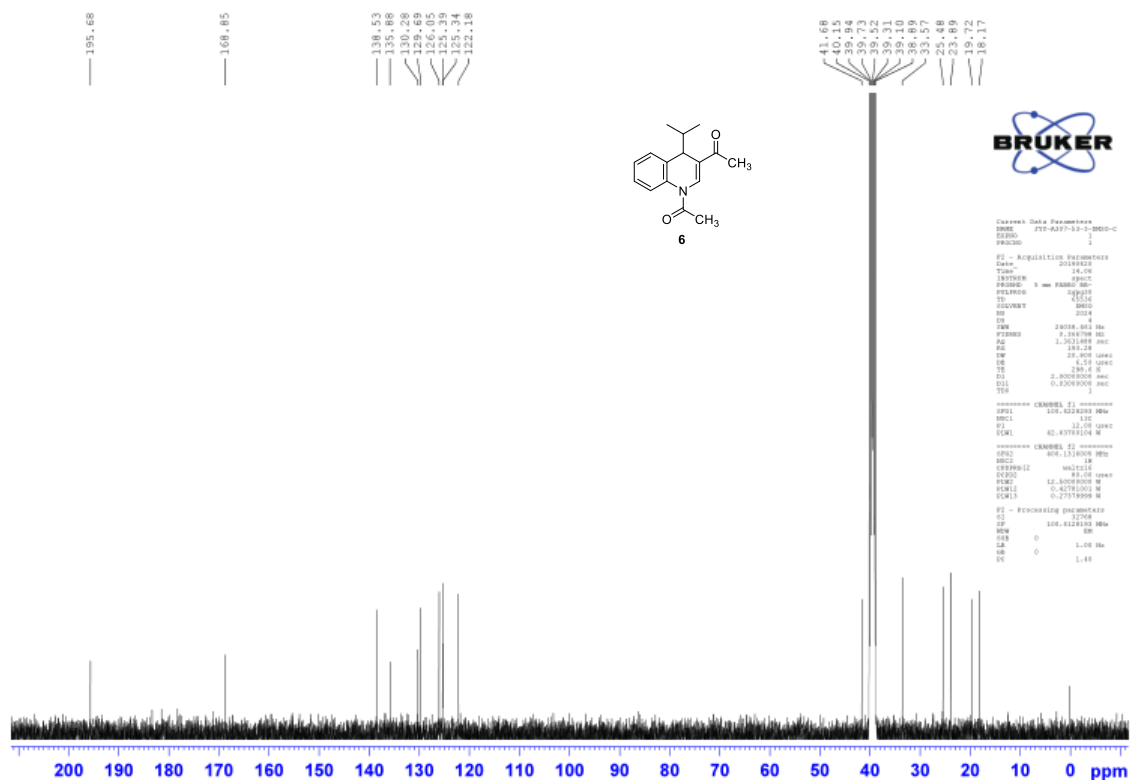

# SUPPORTING INFORMATION

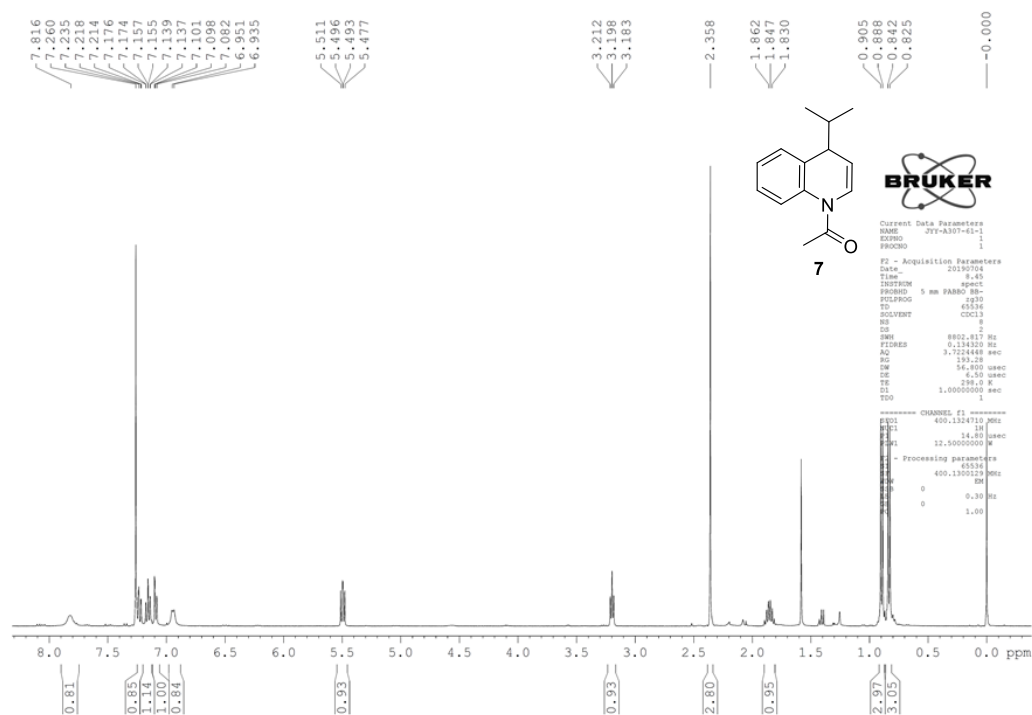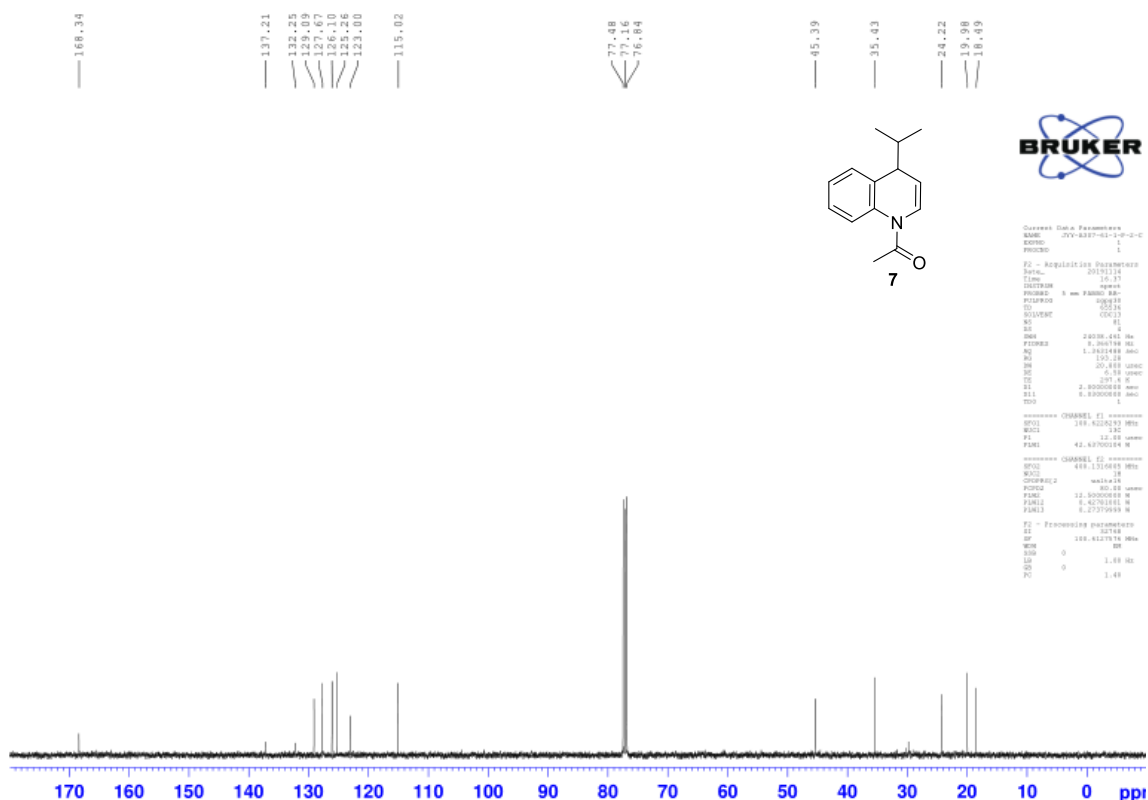

# SUPPORTING INFORMATION

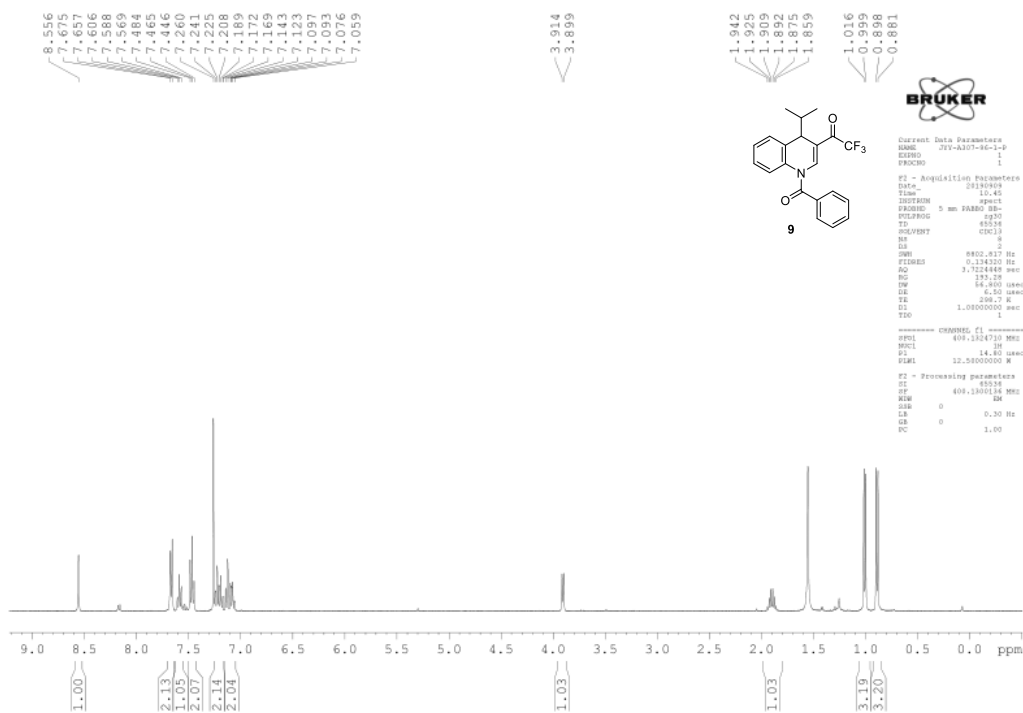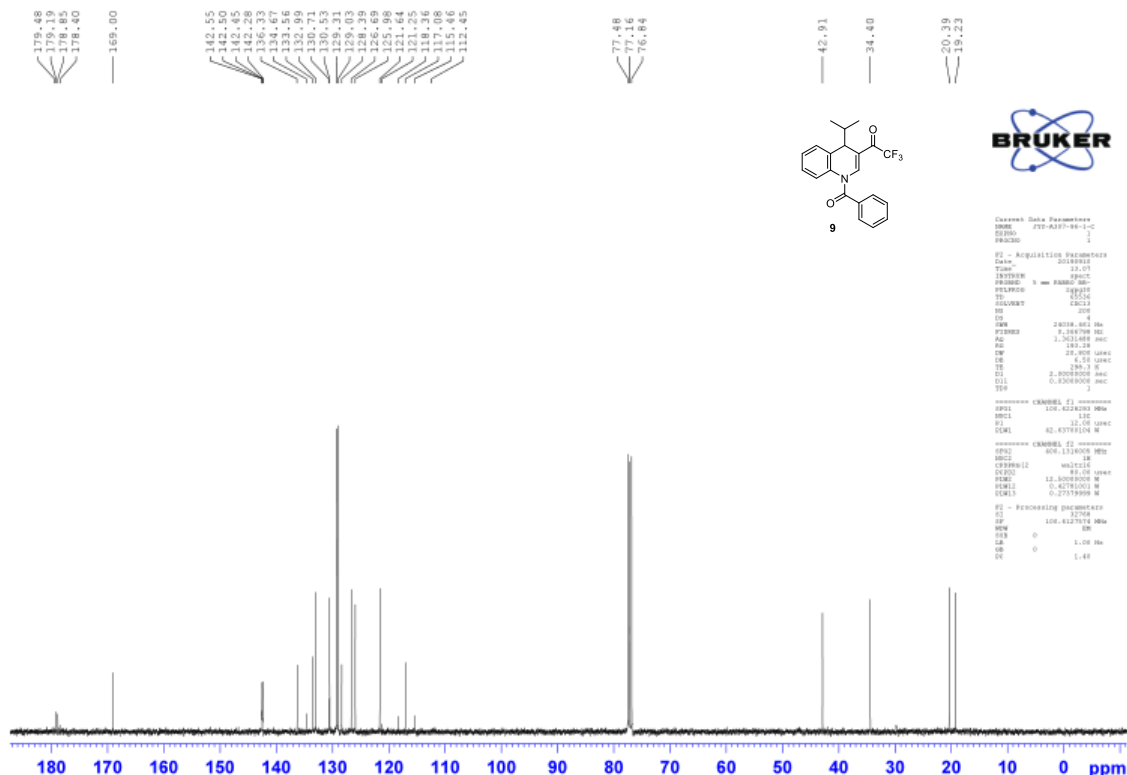

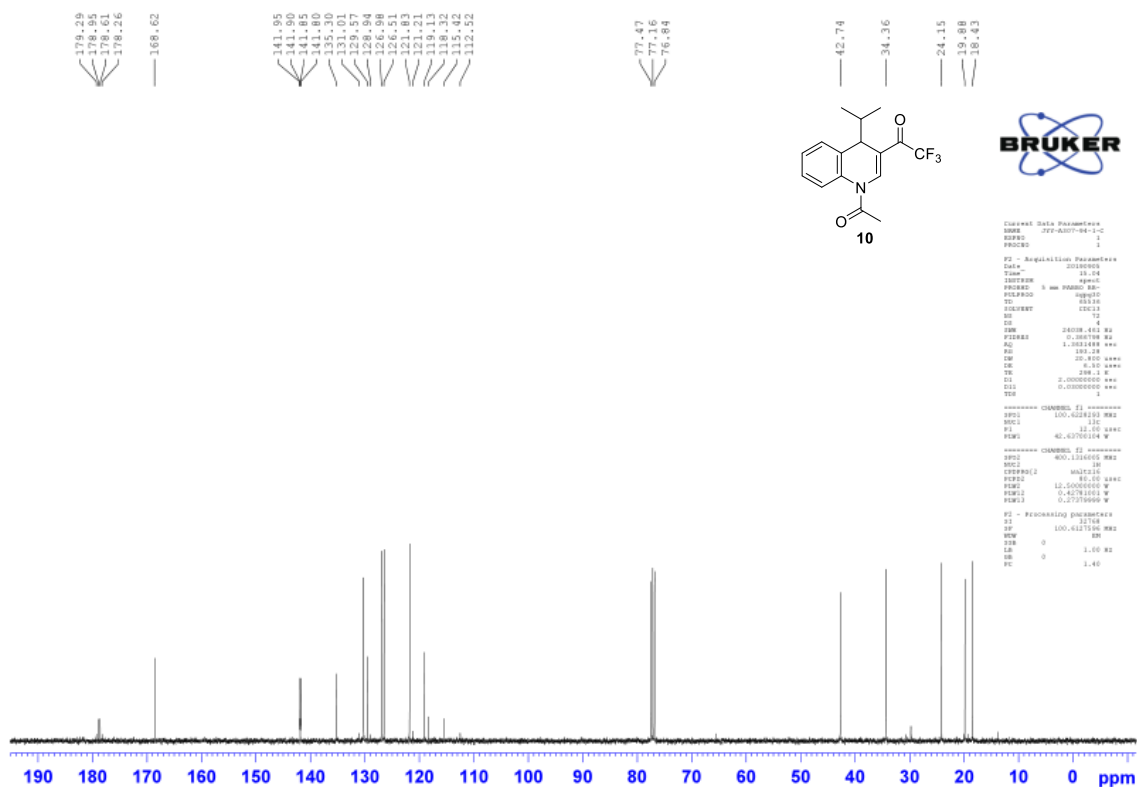

SUPPORTING INFORMATION

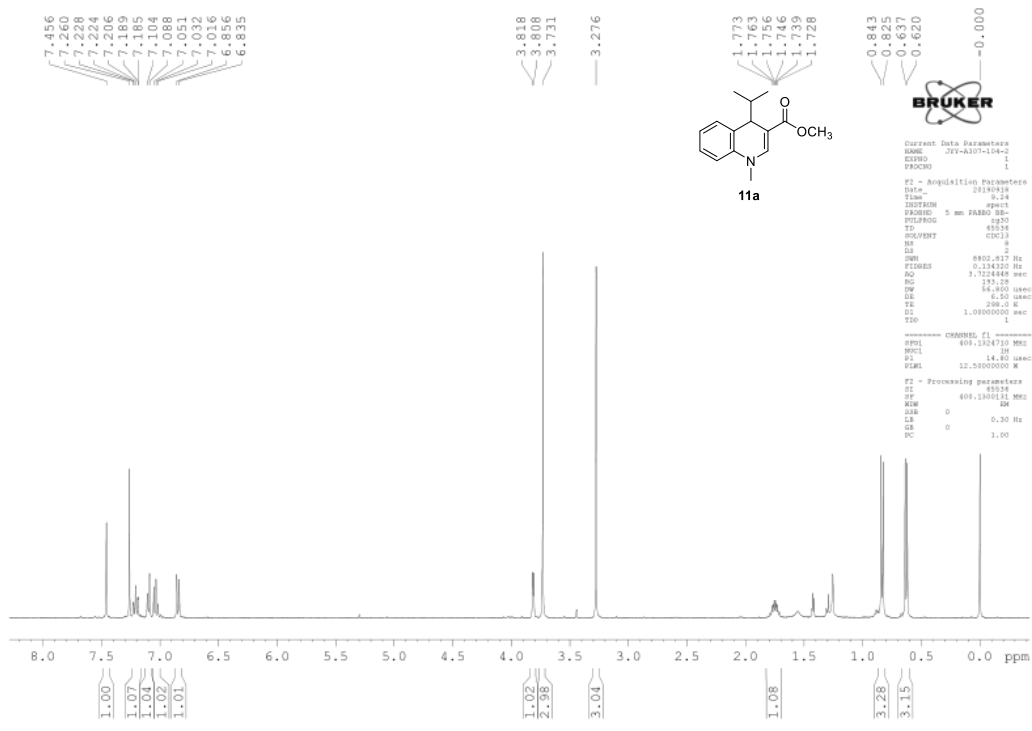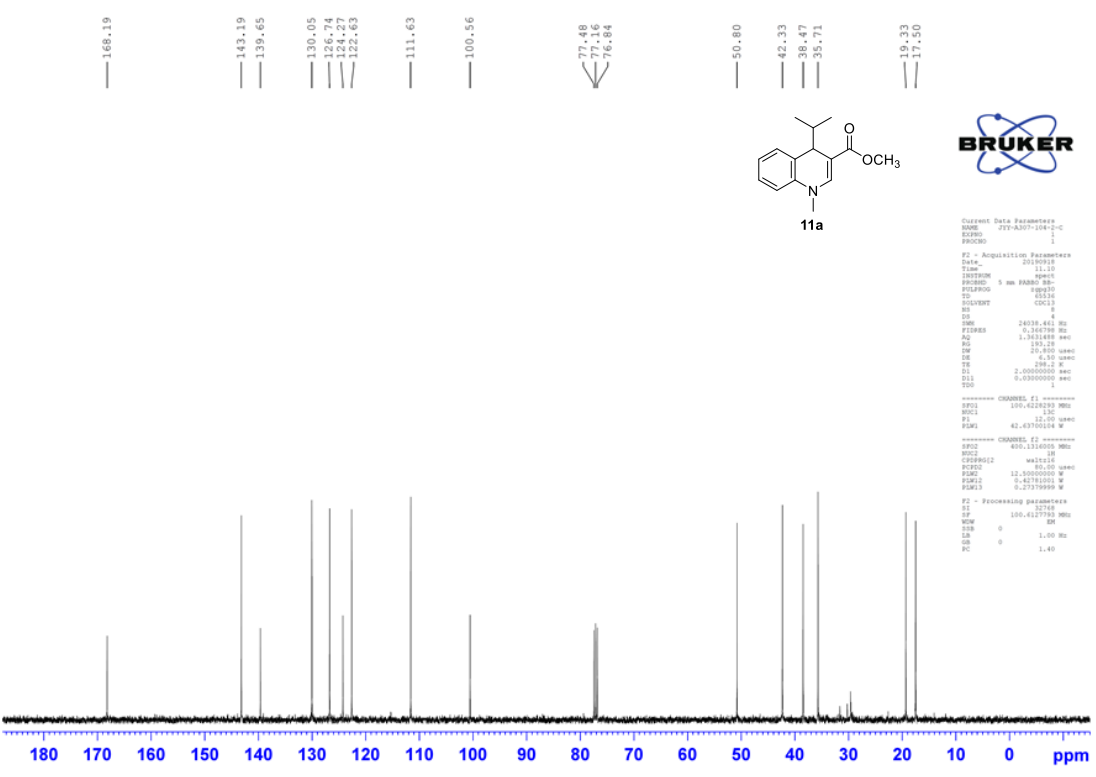

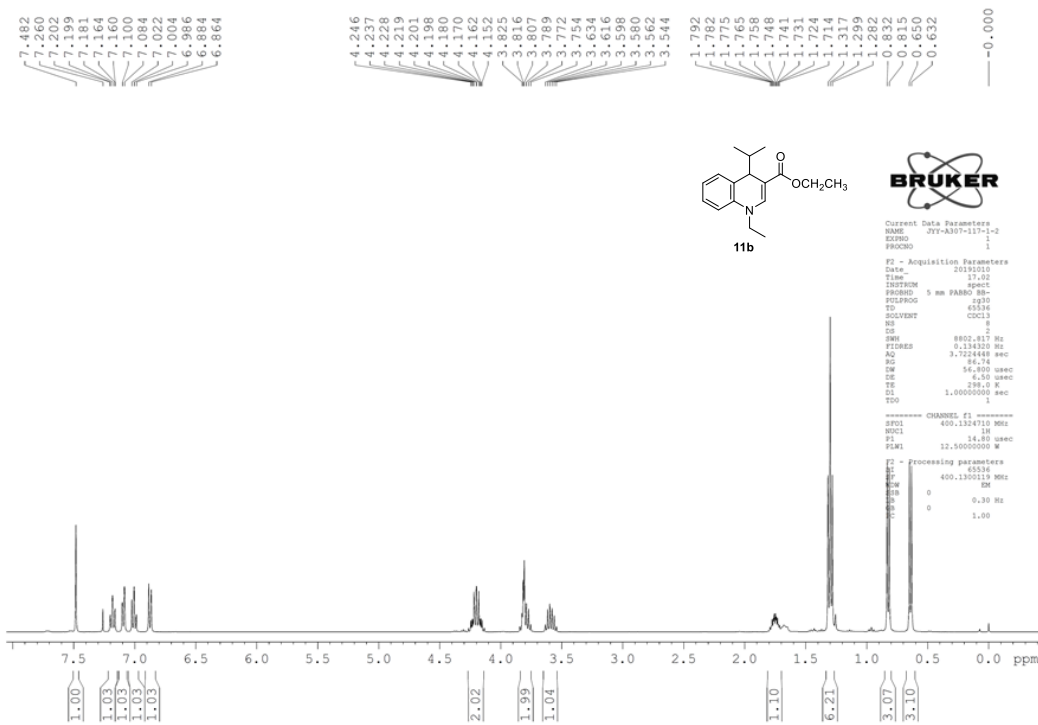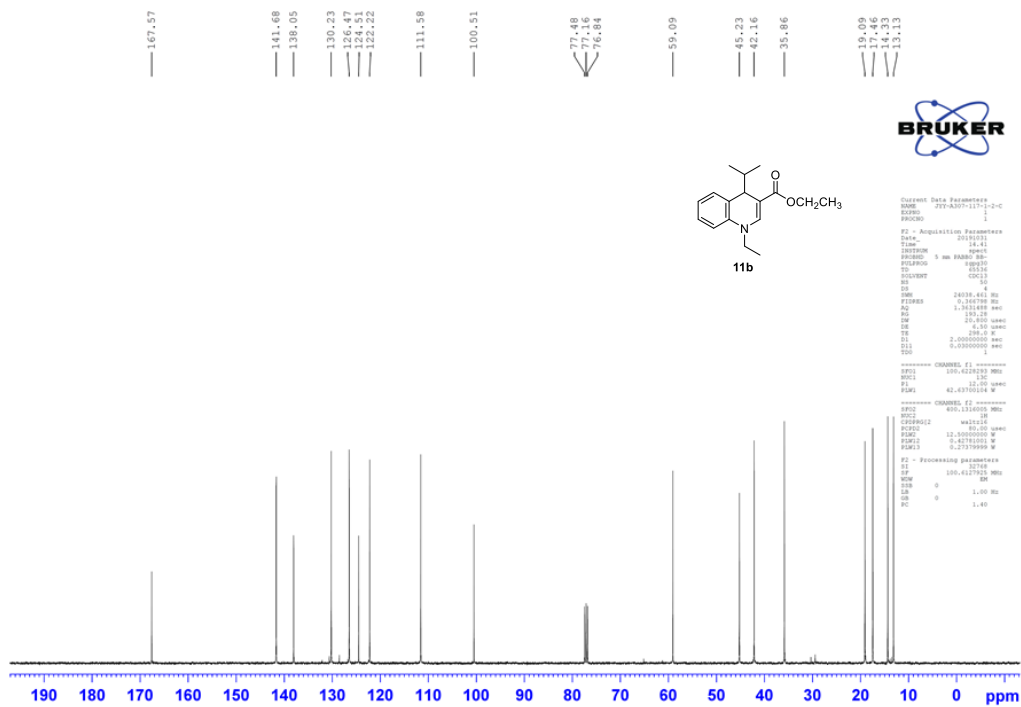



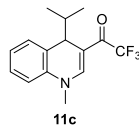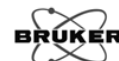

```

Current Data Parameters
NAME          JTY-A307-103-1
EXPNO        1
PROCNO       1

F2 - Acquisition Parameters
Date_         20180924
Time          14.33
INSTRUM       spect
PROBHD        5 mm FATHO BB-
PULPROG       zg30
SOLVENT       CDCl3
NS            638
DS            2
SWH            8802.217 Hz
FIDRES        0.134320 Hz
AQ            3.7224448 sec
RG            193.28
CW            56,800 uses
DE            6.50 uses
TE            298.0 K
D1            1.00000000 sec
TDG           1

```

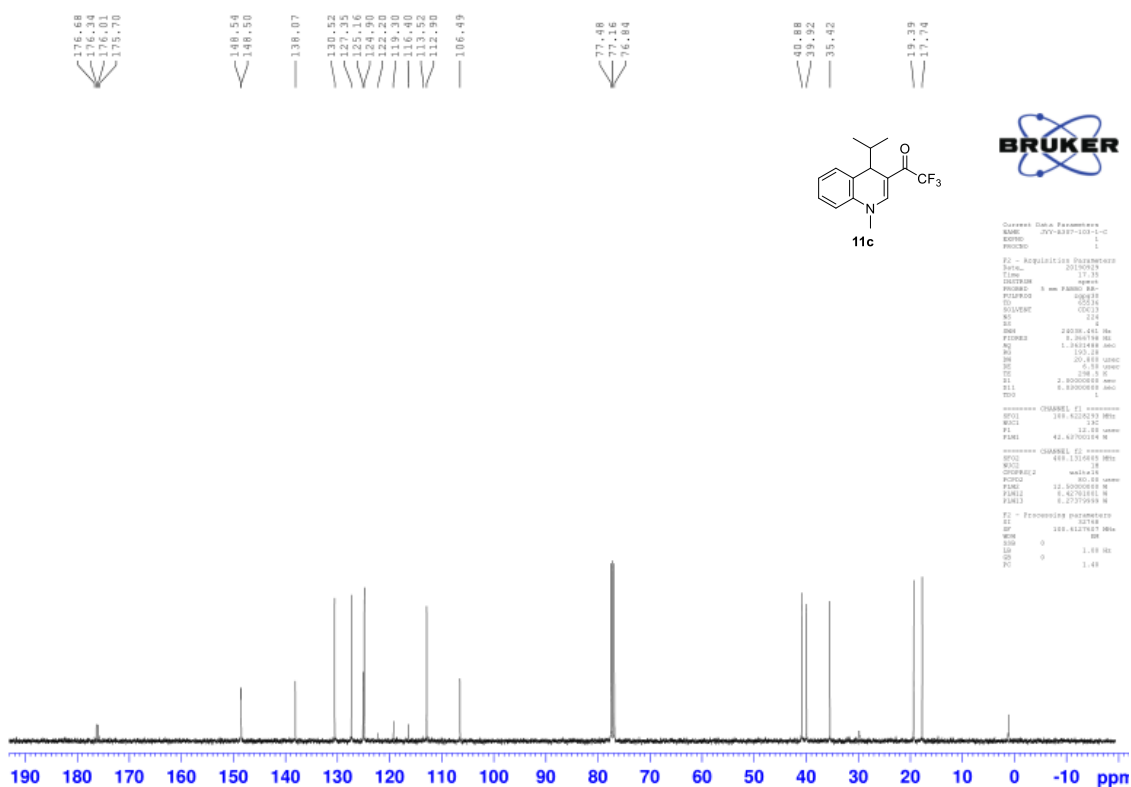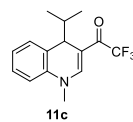

```

Current Data Parameters
NAME      JYV-2327-103-1-C
EXPNO     1
PROCNO    1

F2 - Acquisition Parameters
Date_     20190919
Time      17.39
INSTRUM    spect
PROBHD     5 mm PABBO BB-
PULPROG    zgpg30
TD         65536
SOLVENT    CDCl3
NS         224
DS         4
SWH         24238.481 Hz
FIDRES     0.3661980 Hz
AQ         1.3621488 sec
RG          192.28
SR         20.418 cm-1
SC         6.58 umax
TE         298.5 K
DE         2.00000000 mmol
D11        0.30000000 mmol
D12         1.00
D13         1.00

```

```
***** CHANNEL F1 *****
SF01      100.6226293 MHz
WAC1      13C
F1         12.00 us/cm
FLM1      42.62700104 M
```

```

***** CHANNEL F2 *****
SFO2      449.131645 MHz
WAG2      1M
CFOFREQ2   50000000 Hz
PCFO2      80.00 kHz
PLM1      12.50000000 M
PLM2      0.42701601 M
PLM3      0.27379999 M

```

|                            |   |                |
|----------------------------|---|----------------|
| F2 - Processing parameters |   |                |
| SI                         |   | START          |
| MF                         |   | 100.612767 MHz |
| WOM                        |   | SR             |
| SIG                        | 0 |                |
| LR                         |   | 1.00 Hz        |
| GS                         | 0 |                |
| PC                         |   | 1.48           |

SUPPORTING INFORMATION

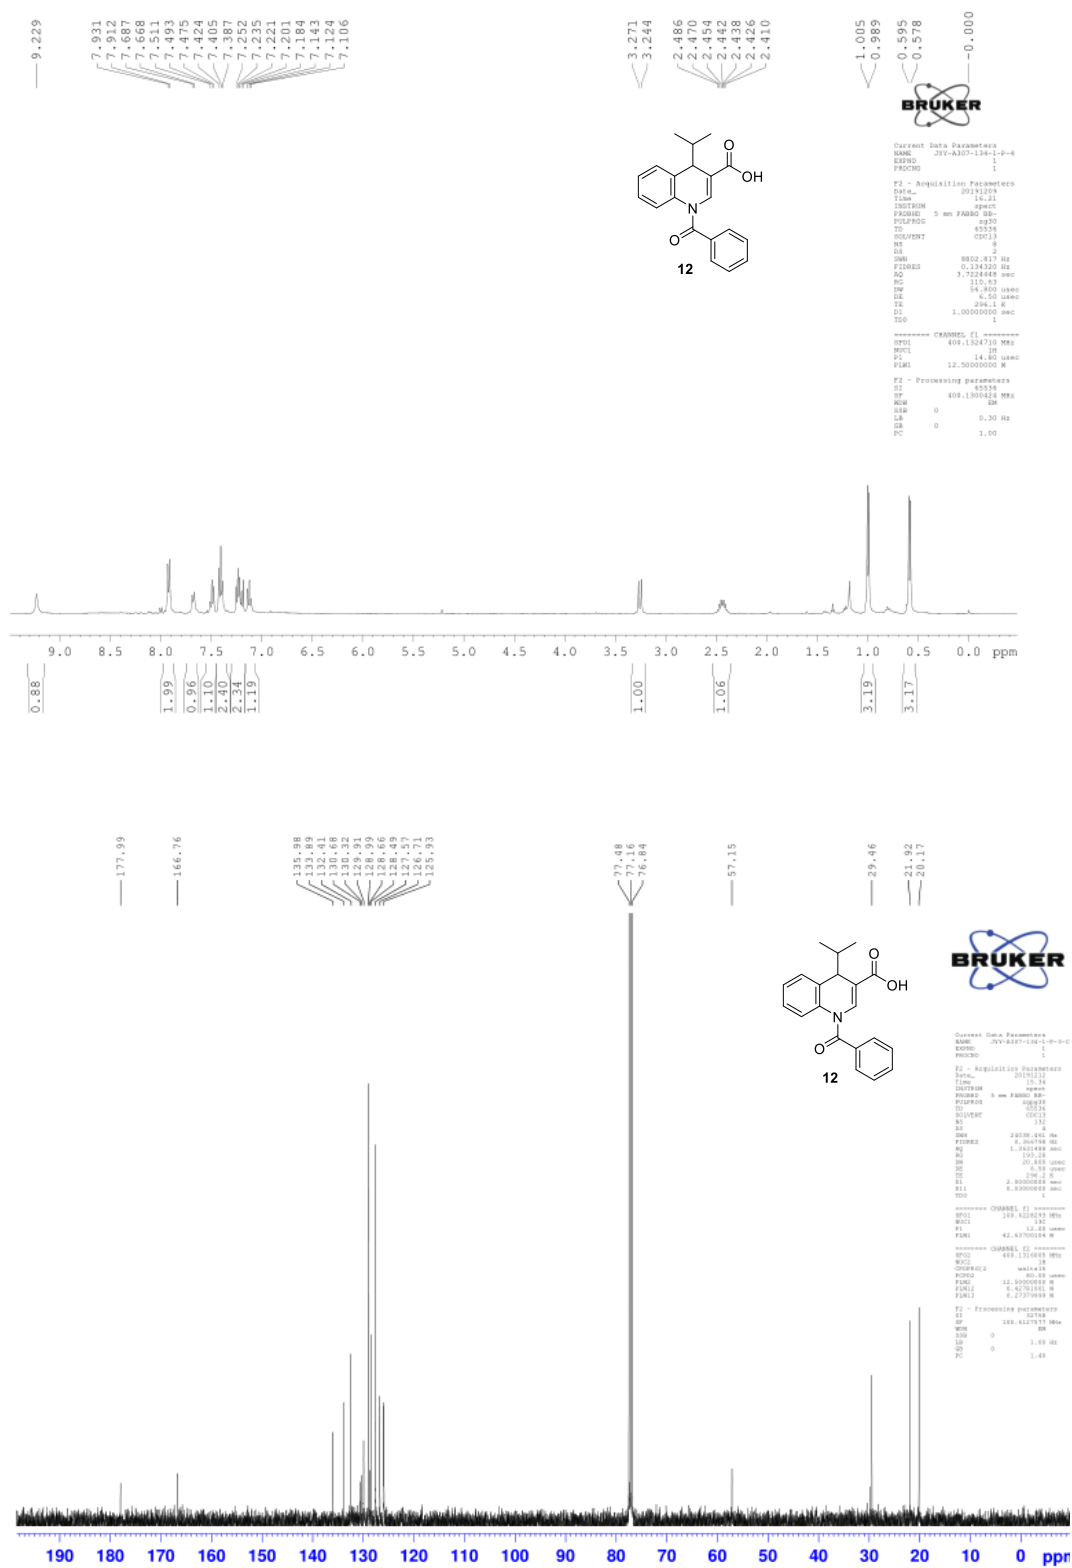

# SUPPORTING INFORMATION

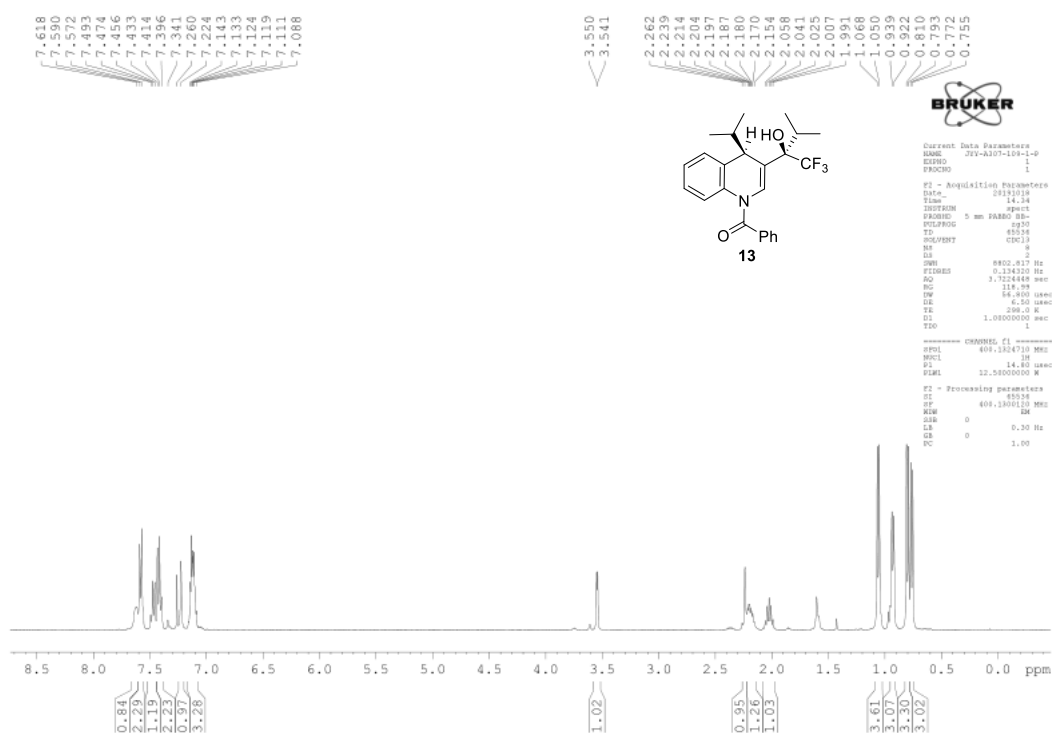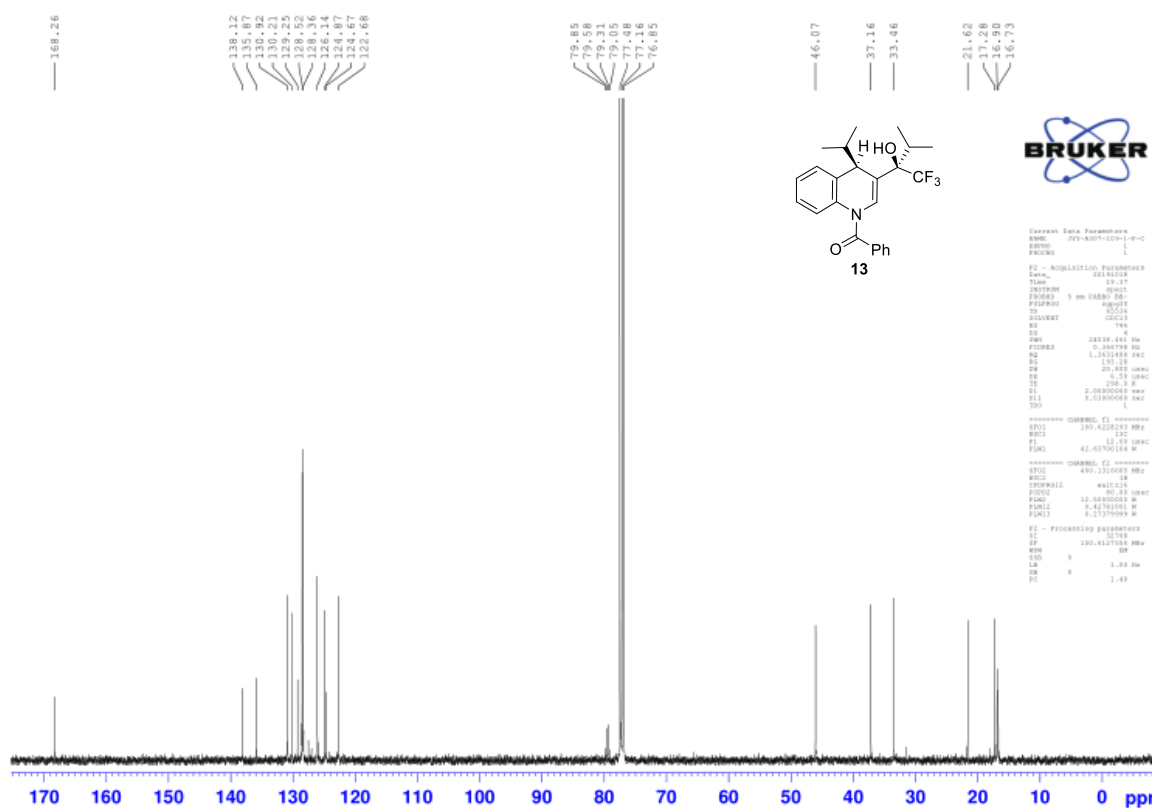

# SUPPORTING INFORMATION

## COSY Spectrum of 13

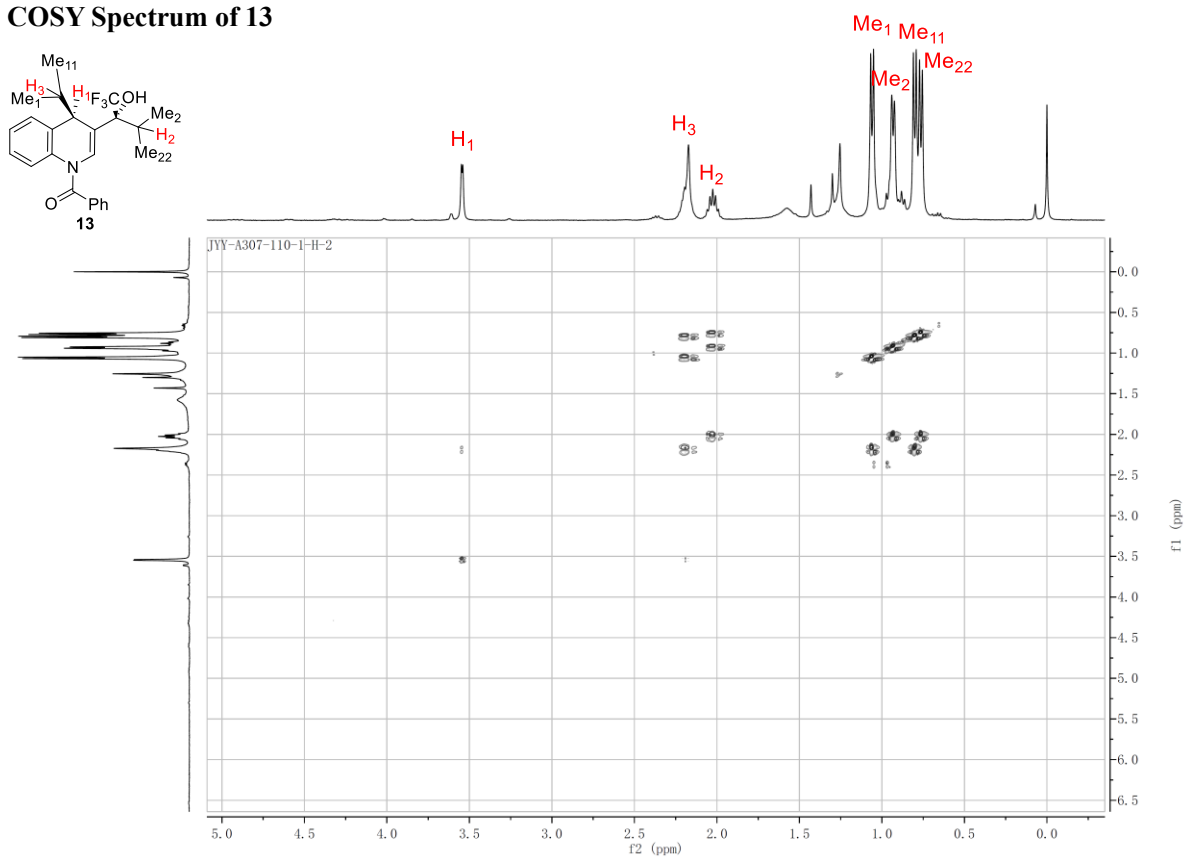

## NOESY Spectrum of 13

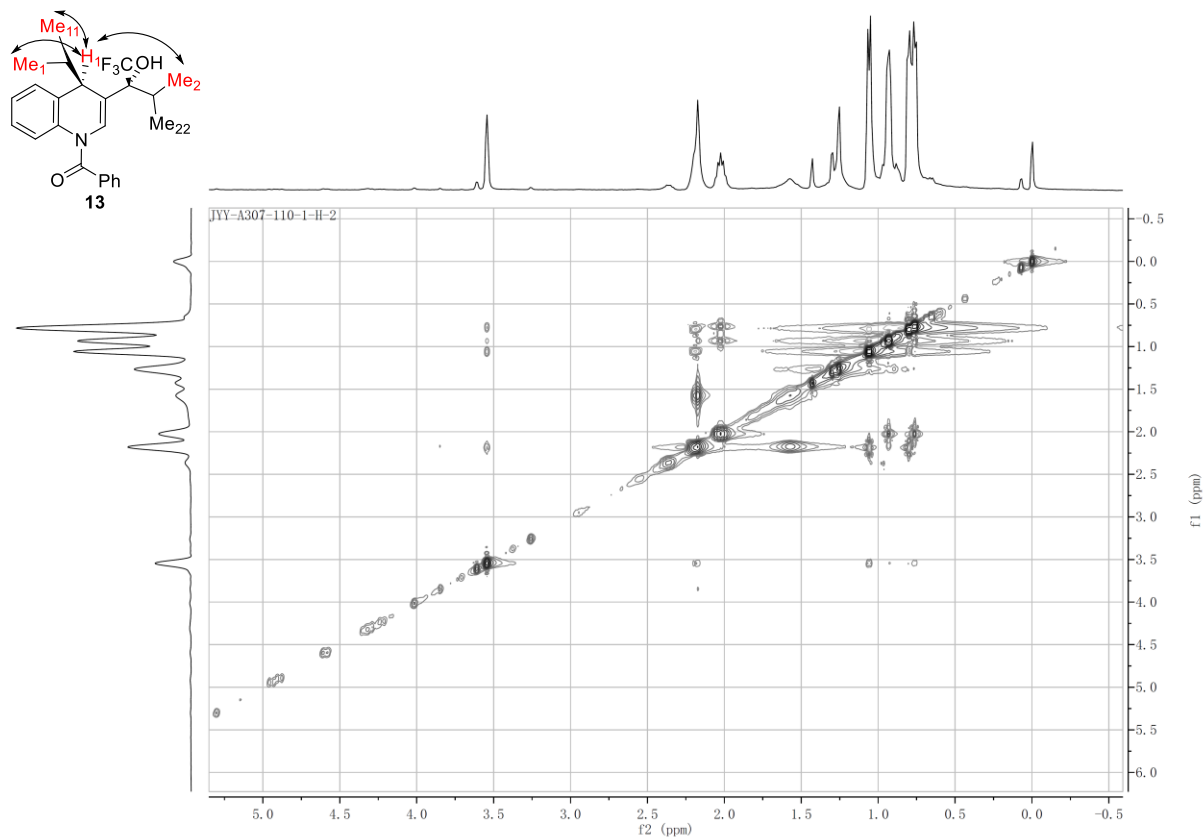

## 2. Rationalization of the relative stereo configuration of 13

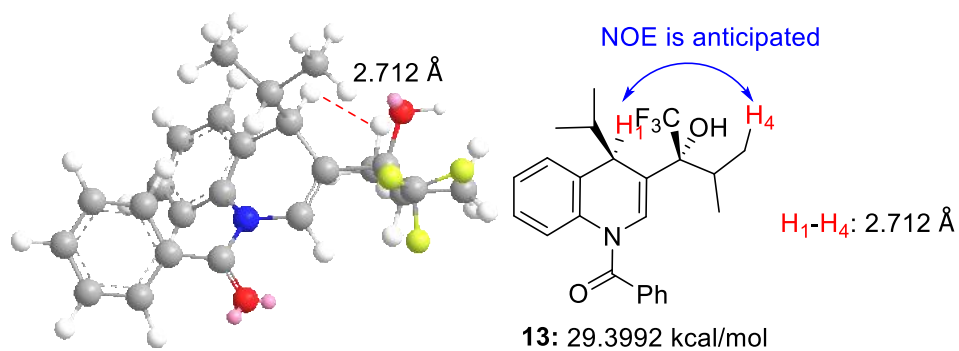

**Fig.1** Most stable conformation of **13** calculated by ChemDraw 14.0 3D

# SUPPORTING INFORMATION

## 3. Copy of NMR spectrum for 14-19

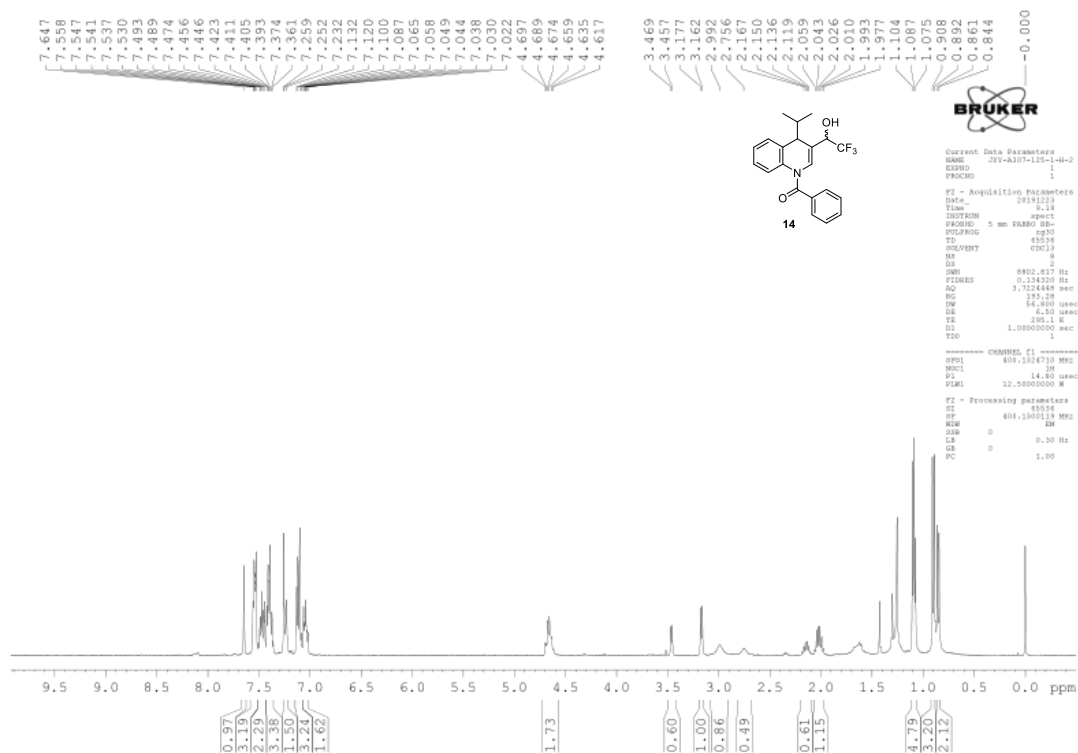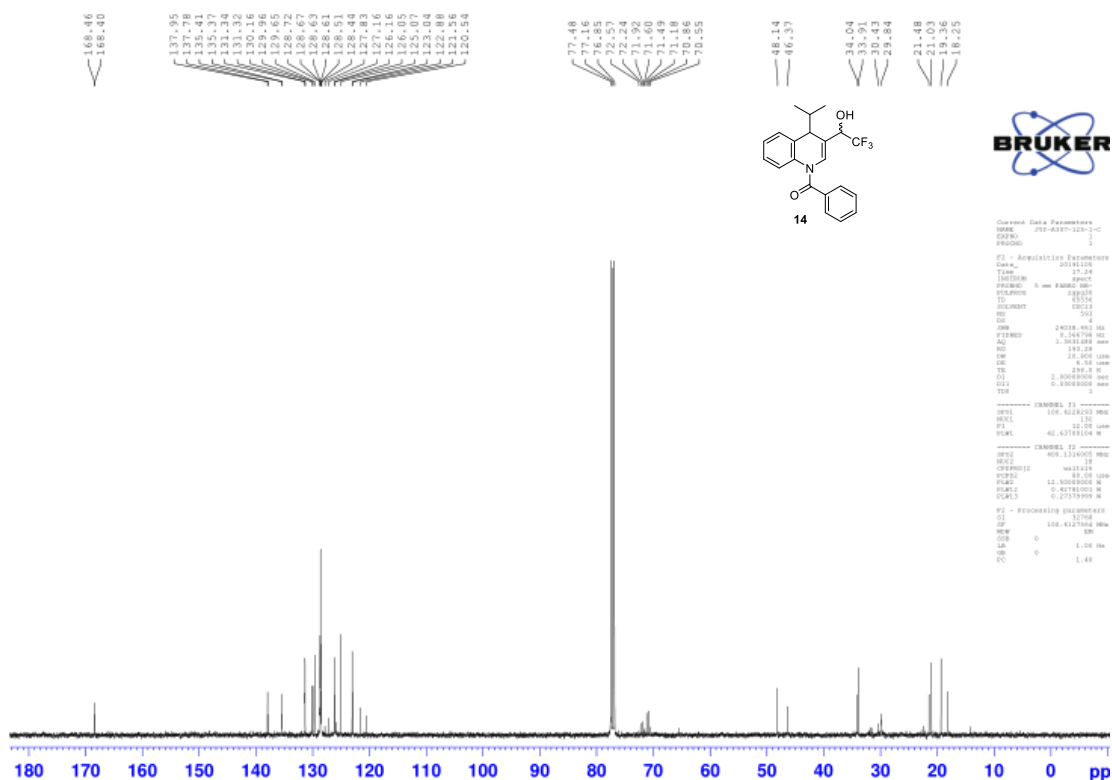

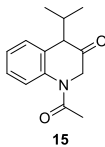

```
Current Data Parameters
NAME          JFV-A07-114-I-3
EPIFNO       1
PROCNO       1

F2 - Acquisition Parameters
TIME          2819.916
SOURCES      aspect
PROBHD       5 mm PABBO Hb-
PULPRG       zps30
TD           65536
AQ           0.7610
NS           8
DS           8
SWH          8802.017 Hz
FTDRES       0.134230 Hz
SF           3.7224488e+08
AQ           185.28
SQ           66.800 (use)
SR           6.50 (use)
TR           298.0 Hz
DI           1.00000000 Mac
TDO         -
----- CHANNEL F1 -----
MPC1         409.124274 MHz
MPC2         1M
MPC3         14.80 (use)
FREQ1        22.50000000 M

F2 - Processing parameters
MPC1         409.124274 MHz
RF           409.1300130 MHz
NUC1         31
LB           0
GB           0
LS           0
SB           0
TB           0
```

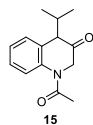[illegible]

# SUPPORTING INFORMATION

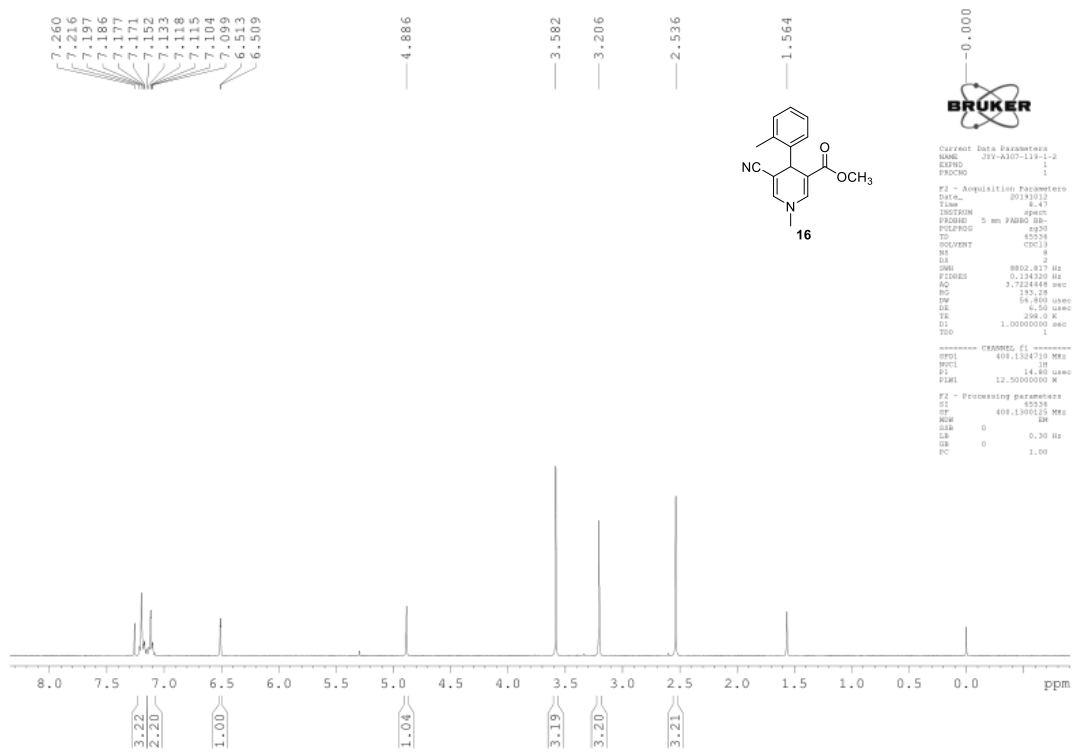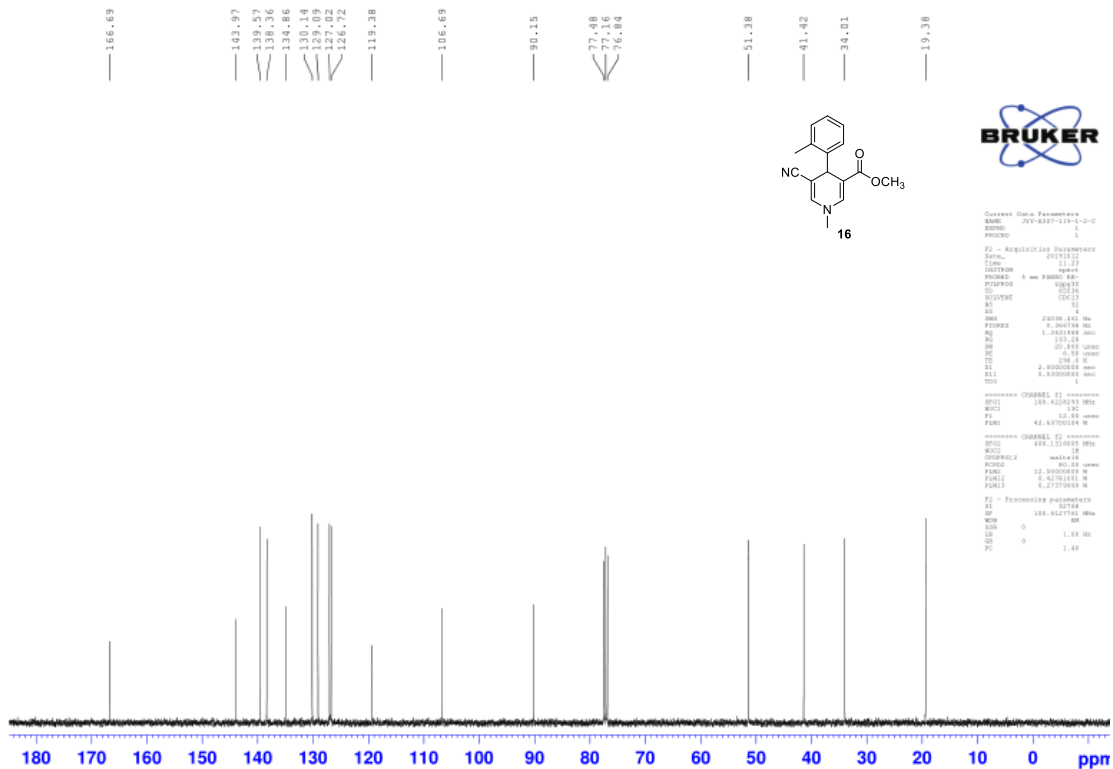



# SUPPORTING INFORMATION

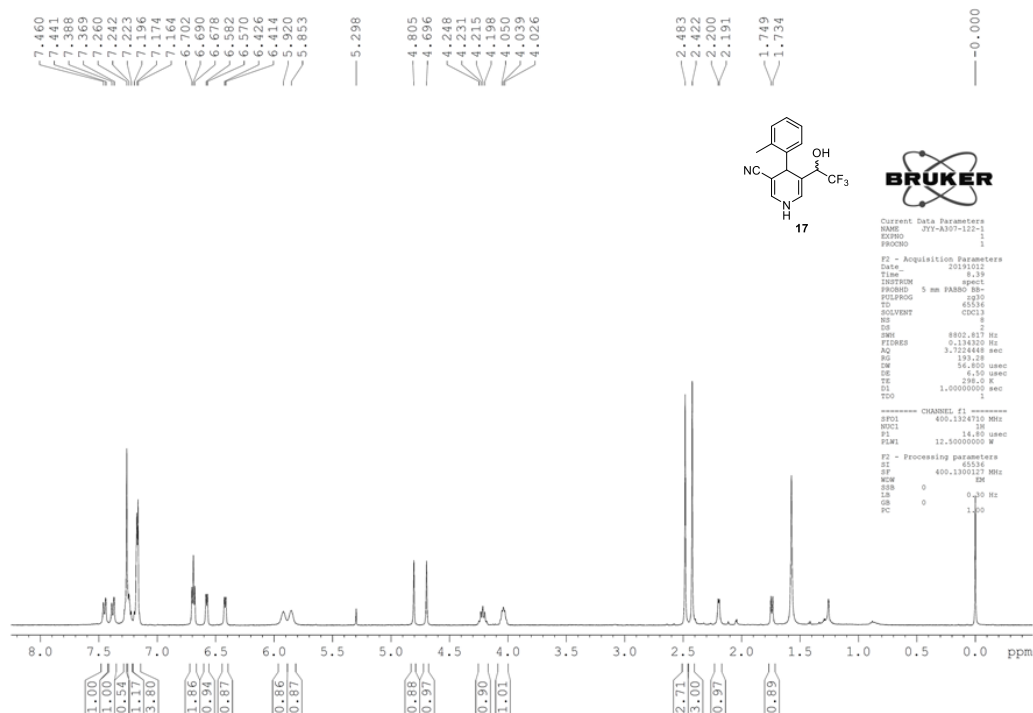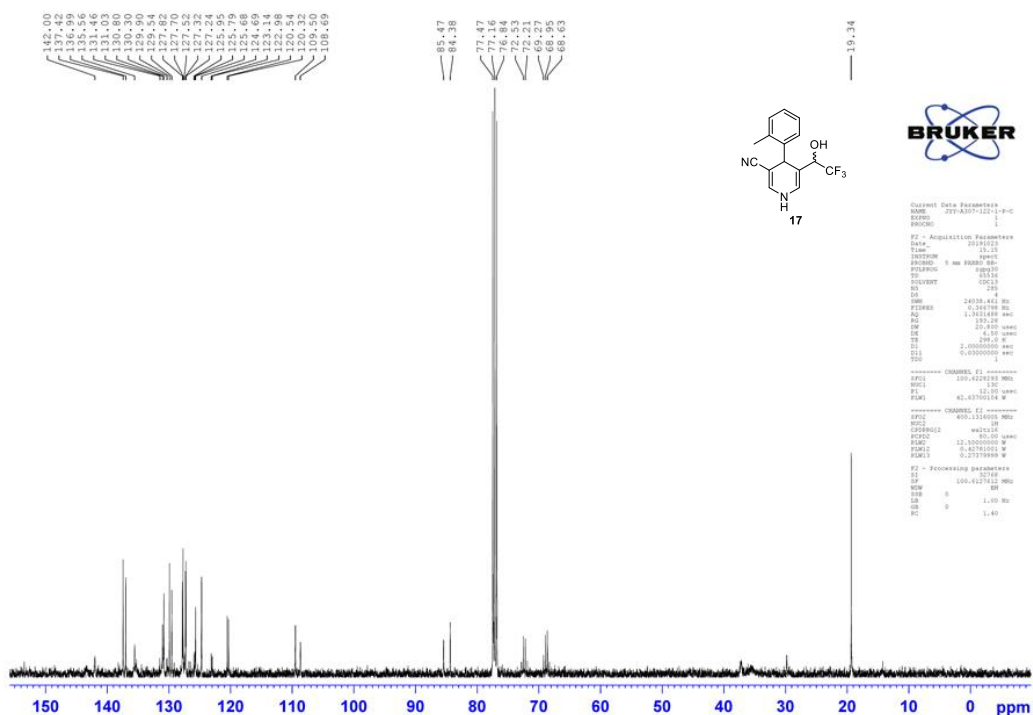

SUPPORTING INFORMATION

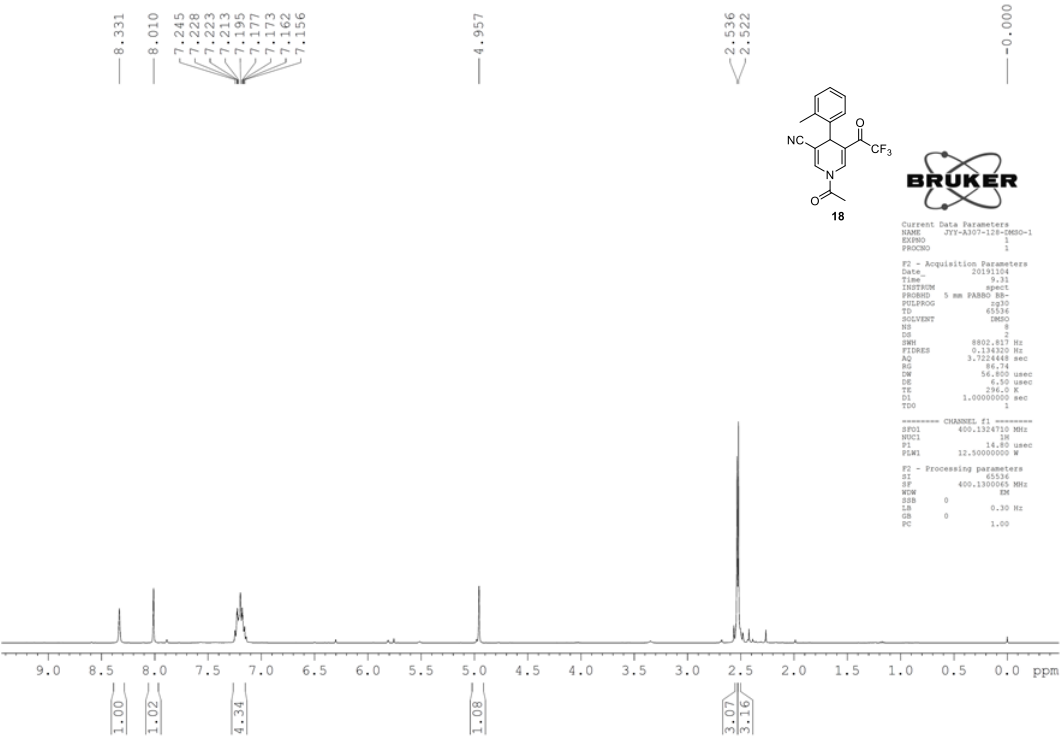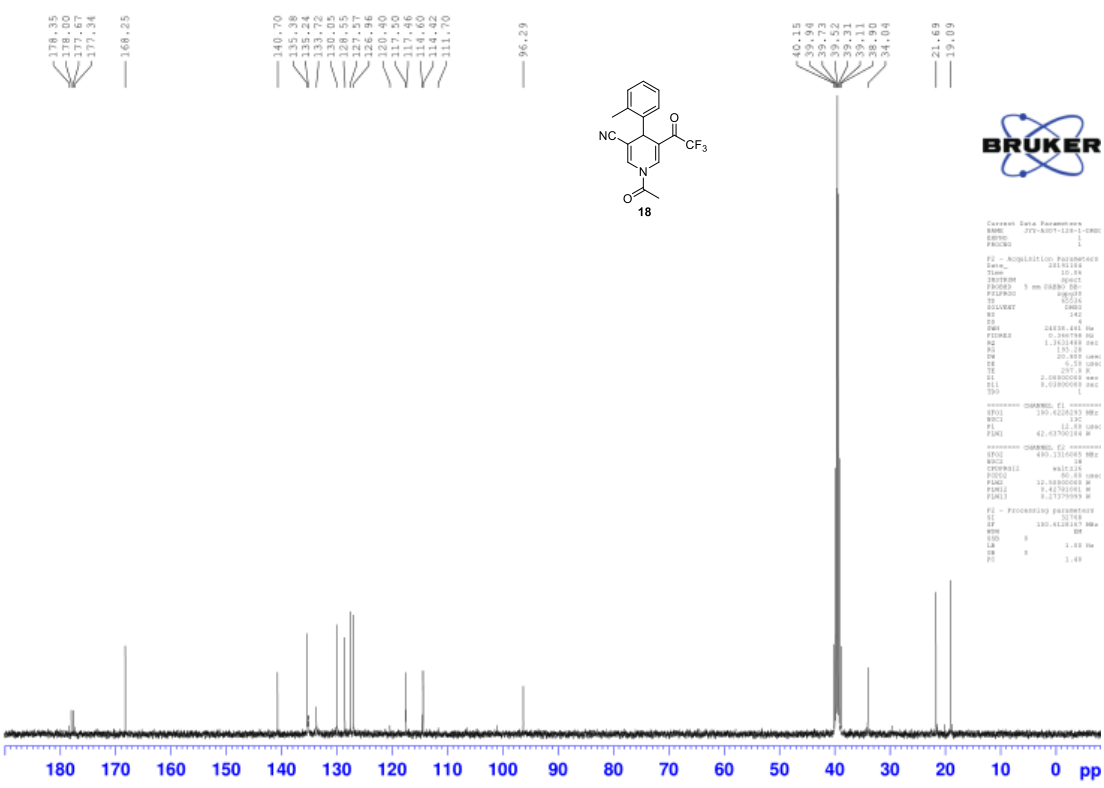

# SUPPORTING INFORMATION

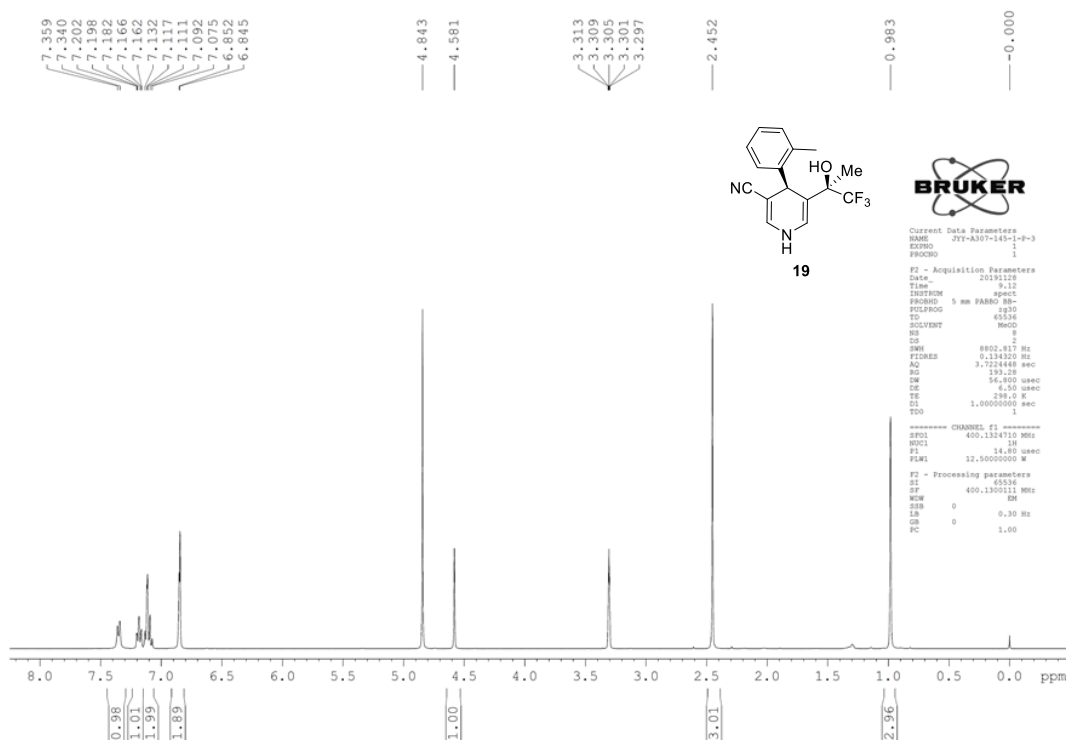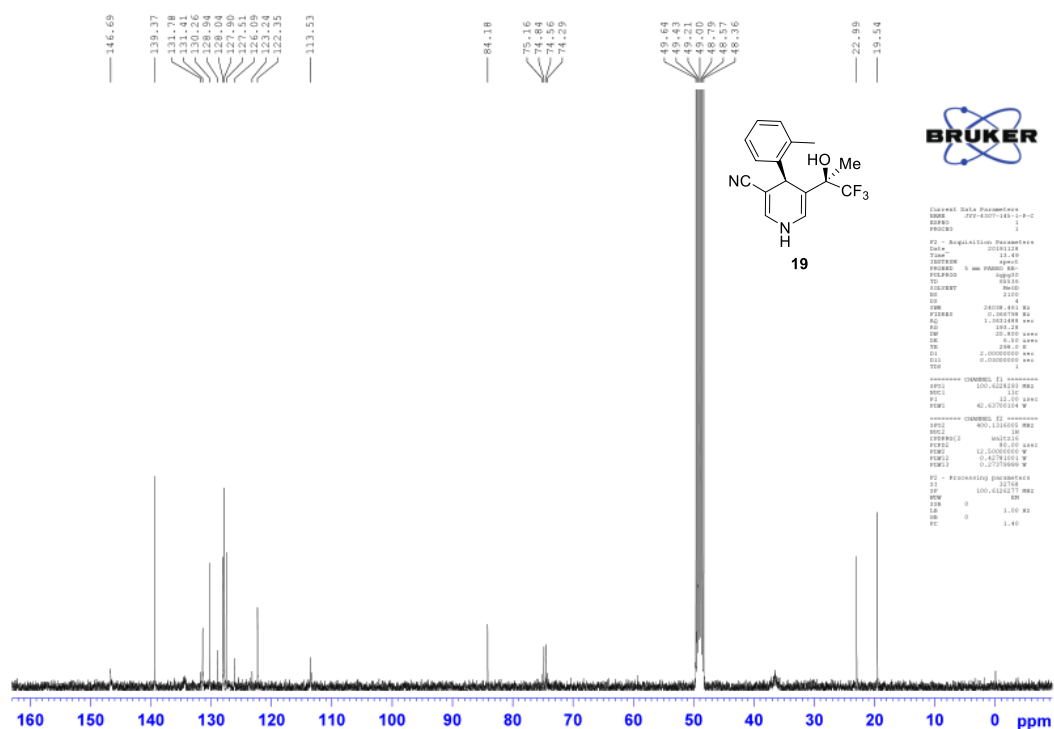

## SUPPORTING INFORMATION

### COSY Spectrum of 19 in d6-DMSO

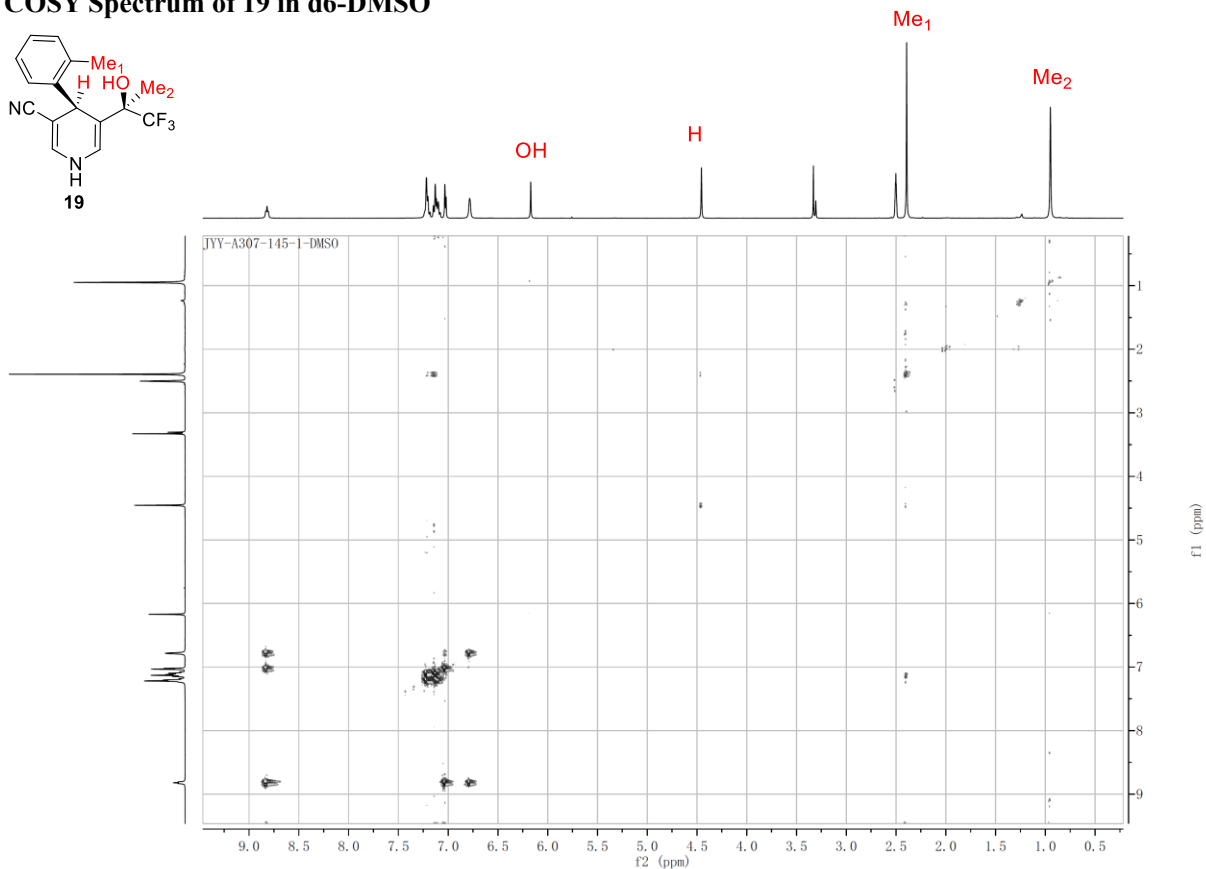

### NOESY Spectrum of 19 in d6-DMSO

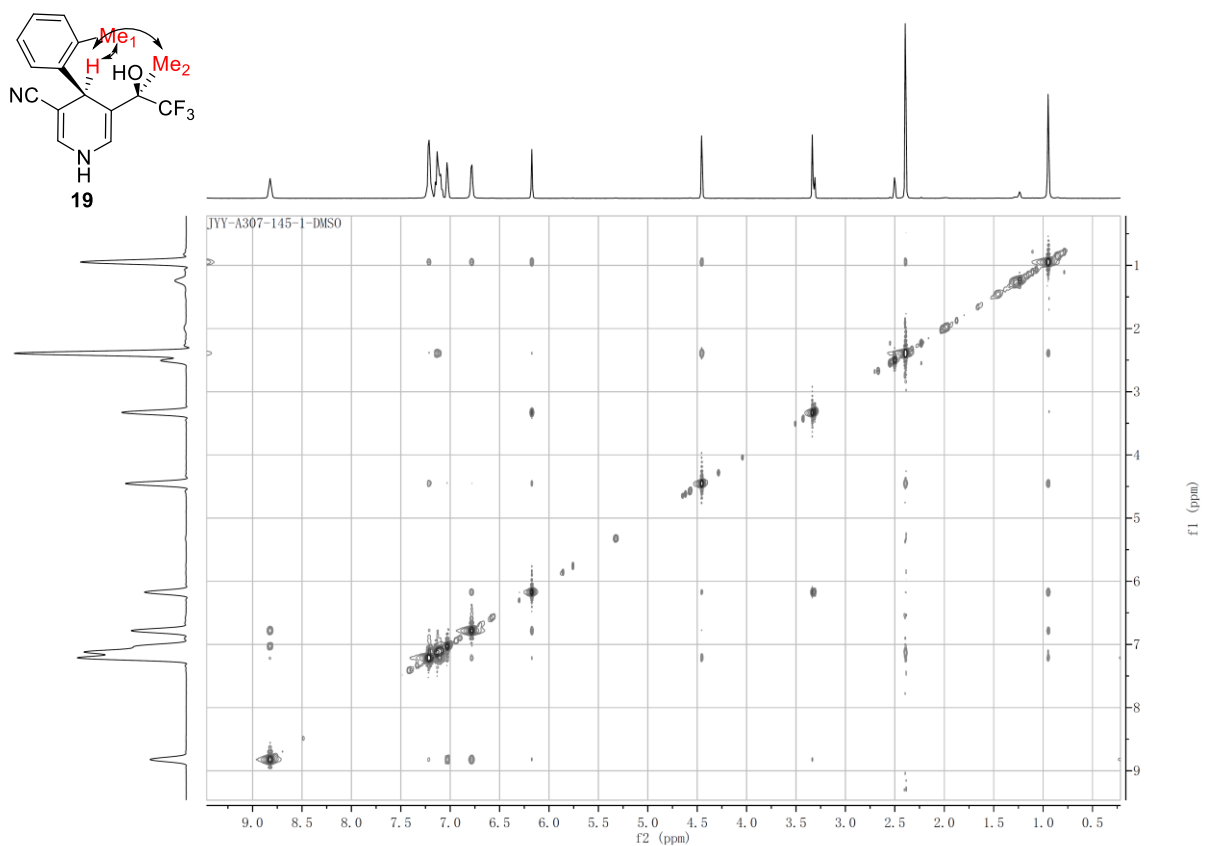

4. Rationalization of the relative stereo configuration of **19**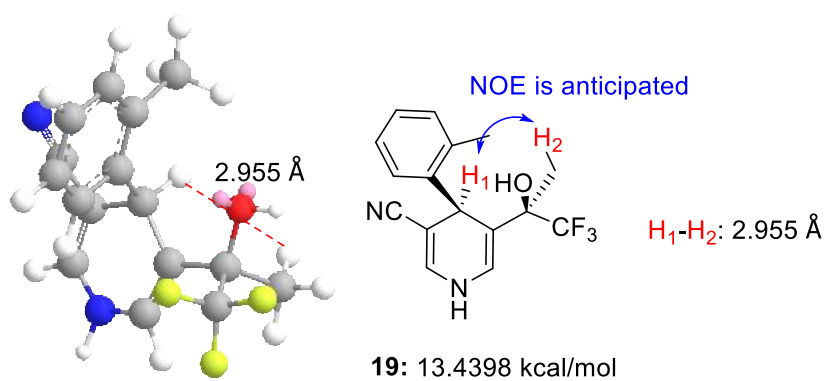

**Fig.2** Most stable conformation of **19** calculated by ChemDraw 14.0 3D
